# Supplementary material
Source: PubMed Central journal article supplement (PMC2927118)
Supplement: NIHMS225932-supplement-1_si_001.pdf [file NIHMS225932-supplement-1_si_001.pdf]

# **Enantioselective Formal Synthesis of (-)- Englerin A via a Rh-catalyzed [4+3] Cycloaddition Reaction**

Jing Xu, Eduardo J.E. Caro-Diaz and Emmanuel A. Theodorakis

*Department of Chemistry and Biochemistry,  
University of California, San Diego  
9500 Gilman Drive, La Jolla CA, 92037*

## **SUPPORTING INFORMATION**

General Procedures S 1

Experimental Procedures S 2 - S 11

NMR Spectra S 12 - S 29

X-ray data of compound **13** S 30 - S 36

## General Procedures

All reactions were carried out under argon atmosphere. Solvents were dried as follows: THF over sodium-benzophenone, toluene over Na, dichloromethane and MeOH over CaH<sub>2</sub>. NEt<sub>3</sub>, diisopropylamine and propanaldehyde were dry distilled from flamed dried 4Å powdered molecular sieves. Dry hexanes was purchased from Sigma Aldrich and used directly. Chromatography: Flash column chromatography was performed on silica gel (Merck Kieselgel 60, 230-400 mesh) using Hexane-EtOAc (H-E) mixtures of increasing polarity. <sup>13</sup>C NMR and <sup>1</sup>H NMR spectra: These were recorded on 400 MHz and 500 MHz Varian instruments and 500 MHz JOEL instrument. CDCl<sub>3</sub> was treated with flamed dried K<sub>2</sub>CO<sub>3</sub>, chemical shifts (δH) are quoted in parts per million (ppm) referenced to the appropriate residual solvent peak (CHCl<sub>3</sub>), with the abbreviations s, br s, d, t, q, and m denoting singlet, broad singlet, doublet, triplet, and multiplet respectively. *J* = coupling constants given in Hertz (Hz) were analyzed by MestReNova software. Mass spectra: HRMS were recorded on a trisector WG AutoSpecQ spectrometer. Optical Rotation: [α]<sub>D</sub> measurements were collected on a Jasco P-1010 polarimeter using HPLC grade CHCl<sub>3</sub> (dried over molecular sieves). Microwave reactor: Microwave experiments were carried out in Biotage (model:Initiator) microwave reactor using high pressure vessels.

**(1*R*,5*S*)-(R)-4,4-dimethyl-2-oxotetrahydrofuran-3-yl3-[(*tert*-butyldimethylsilyl)oxy]-5-isopropyl-1-methyl-8-oxabicyclo[3.2.1]octa-2,6-diene-2-carboxylate (5).**

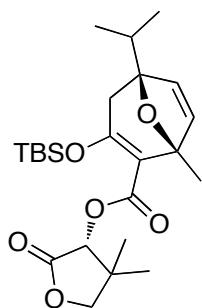

**5**

A solution of **7** (11.2 g, 31.6 mmol) in dry hexanes (750 mL) was added dropwise over 5.5 hours to a refluxing solution of **6** (7.85 g, 8.8 mL) and Rhodium(II) octanoate dimer (492 mg) in dry hexanes (750 mL). The reaction mixture was stirred an additional 30 minutes, at which time TLC showed no starting material remaining. The reaction mixture was then allowed to cooled down to room temperature, filtered and concentrated. Crude product purification using flash column chromatography (hexanes to 10%, very slow gradient, EtOAc/hexanes) afforded 8.1 g of bicyclic ester **5** as colorless thick oil (68%).

$[\alpha]_D^{23} = +36.40$  (c 1.0, CHCl<sub>3</sub>). <sup>1</sup>H NMR (500 MHz, CDCl<sub>3</sub>)  $\delta$ : 6.38 (dd,  $J = 5.7, 0.5$  Hz, 1H), 5.72 (d,  $J = 5.7$  Hz, 1H), 5.40 (s, 1H), 4.04 (q,  $J = 8.9$  Hz, 2H), 2.41 (d,  $J = 17.4$  Hz, 1H), 1.95 - 1.83 (m, 2H), 1.62 (s, 3H), 1.24 (s, 3H), 1.17 (s, 3H), 1.00 (d,  $J = 6.9$  Hz, 3H), 0.95 (d,  $J = 6.8$  Hz, 3H), 0.92 (s, 9H), 0.19 (s, 3H), 0.18 (s, 3H). <sup>13</sup>C NMR (101 MHz, CDCl<sub>3</sub>)  $\delta$  172.4, 164.2, 157.2, 141.6, 126.8, 117.9, 88.6, 82.8, 76.3, 75.0, 40.2, 37.1, 34.3, 25.8, 23.4, 21.5, 20.6, 18.4, 17.2, 17.1, -3.4, -3.5. HRMS (FAB)  $m/z$ : calcd for C<sub>24</sub>H<sub>38</sub>O<sub>6</sub>SiNa (M+Na<sup>+</sup>) 473.2330, found: 473.2331.

**(1*R*,5*S*)-5-isopropyl-1-methyl-2-methylene-8-oxabicyclo[3.2.1]oct-6-en-3-one (12).**

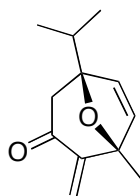

**12**

To a solution of **5** (20.7 g, 45.9 mmol) in dry dichloromethane (459 mL) was added quickly dropwise via addition funnel a 1.0 M solution of DIBAL in heptanes (344.3 mmol, 344.3 mL) at -78 °C. After completion of addition, the reaction was stirred for 15 min at which time TLC showed no starting material. The reaction mixture was quenched with saturated potassium sodium tartrate solution (300 mL), was allowed to reach room temperature and was stirred for 1 hour. The reaction mixture was filtered through celite and washed with DCM until TLC showed no more crude product remaining in the filter cake. The filtered mixture was separated, extracted (2 x 150 mL), washed with brine (300 mL) dried over Na<sub>2</sub>SO<sub>4</sub>, filtered, and concentrated under vacuum to 500 mL of DCM. This solution was flushed with Argon and treated directly with BF<sub>3</sub>·Et<sub>2</sub>O (68.9 mmol, 8.7mL) dropwise at -30 °C. 5 min after addition TLC showed no starting material. The reaction mixture was further diluted with DCM (250 mL), quenched with saturated NaHCO<sub>3</sub> solution (350 mL) and extracted with DCM (2 x 200 mL). The combined organic layers were washed with brine (300 mL), dried over Na<sub>2</sub>SO<sub>4</sub>, filtered, and concentrated under vacuum. Crude product purification using flash column chromatography (1% to 10%, EtOAc/Hexanes) afforded 5.2 g of ketone **12** as a yellow oil (59%).

$[\alpha]_D^{23} = + 103.01$  (c 1.0, CHCl<sub>3</sub>). <sup>1</sup>H NMR (500 MHz, CDCl<sub>3</sub>)  $\delta$ : 6.05 (d,  $J = 5.8$  Hz, 1H), 5.96 (d,  $J = 0.5$  Hz, 1H), 5.92 (d,  $J = 5.7$  Hz, 1H), 5.24 (s, 1H), 2.56 (d,  $J = 17.7$  Hz, 1H), 2.46 (d,  $J = 17.7$  Hz, 1H) 2.00 - 1.89 (m, 1H), 1.61 (s, 3H), 0.99 (d,  $J = 4.9$  Hz, 3H), 0.98 (d,  $J = 4.7$  Hz, 3H). <sup>13</sup>C NMR (101 MHz, CDCl<sub>3</sub>)  $\delta$  197.7, 147.3, 136.2, 133.4, 115.2, 89.7, 84.8, 45.8, 33.6, 19.8, 17.3. HRMS (FAB)  $m/z$ : calcd for C<sub>12</sub>H<sub>17</sub>O<sub>2</sub> (M+H<sup>+</sup>) 193.1223, found: 193.1224.

**(1*S*,2*S*,5*R*)-2-hydroxy-1-isopropyl-5-methyl-4-methylene-8-oxabicyclo[3.2.1]oct-6-en-3-one**

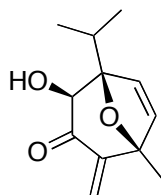

**13**

*n*-Butyllithium (77.6 mL, 124.2 mmol) was added dropwise to a solution of dry diisopropylamine (19 mL, 135.0 mmol) in dry THF (800 mL) at -78 °C. The reaction mixture was stirred for 15 minutes, and then a solution of **12** (5.2 g, 27.0 mmol) in dry THF (500 mL) was added quickly dropwise to the reaction mixture. The reaction mixture temperature was raised from -78 °C to 0 °C over 45 minutes and stirred 1 hour at 0 °C. The reaction mixture was cooled down to -78 °C and TMSCl (15.8 mL, 124.2 mmol) was added dropwise. The reaction mixture temperature was raised from -78 °C to 0 °C over 45 minutes and stirred for 1 hour at 0 °C at which time TLC showed no starting material. The reaction mixture was diluted in hexanes (650 mL) quenched with 5% NaHCO<sub>3</sub> solution (500 mL), washed with brine (300 mL), dried over Na<sub>2</sub>SO<sub>4</sub>, filtered, and concentrated under vacuum. To a solution of the crude enol ether product in DCM (250 mL) a solution of NaHCO<sub>3</sub> (250 mL, 10%) was added all at once at 0 °C. Then a solution of *m*CPBA (5.2 g, 30.0 mmol) in DCM (60 mL) was added slowly while vigorous stirring of the reaction mixture. The reaction was closely monitored by TLC. When traces of enol ether (> 5%) was observed the reaction was further diluted in DCM (200 mL), quenched with saturated NaHSO<sub>3</sub> solution (300 mL), allowed to reach room temperature, extracted with DCM (2 x 200 mL), washed with brine (300 mL), dried over Na<sub>2</sub>SO<sub>4</sub>, filtered, and concentrated under vacuum to approximately 250 mL. To this solution of crude epoxide product was added a solution of (COOH)<sub>2</sub> (15.6 g, 124.2 mmol) in MeOH (150 mL). After 30 min of stirring at room temperature TLC showed no epoxide product remaining. The reaction mixture was slowly quenched with saturated K<sub>2</sub>CO<sub>3</sub> solution until neutral pH was achieved and extracted with DCM (2 x 200 mL). The combined organic layers were washed with brine (300 mL), dried over Na<sub>2</sub>SO<sub>4</sub>, filtered, and concentrated under vacuum. Crude product purification using flash column chromatography (1% to 20%, EtOAc/Hexanes) afforded **12** (2.7 g) and 2.2 g of  $\alpha$ -hydroxy ketone **13** as a crystalline solid (83% b.r.s.m). Recrystallization from hexanes afforded high purity crystals for X-Ray characterization.

$[\alpha]_D^{23} = + 101.00$  (c 1.3, CHCl<sub>3</sub>). <sup>1</sup>H NMR (500 MHz, CDCl<sub>3</sub>)  $\delta$ : 6.08 (dd, *J* = 5.8, 0.9 Hz, 1H), 6.00 (d, *J* = 5.9 Hz, 1H), 5.97 (s, 1H), 5.28 (s, 1H), 3.81 (d, *J* = 6.4 Hz, 1H), 2.37 - 2.28 (m, 1H), 1.62 (s, 3H), 1.05 (d, *J* = 6.9 Hz, 3H), 0.94 (d, *J* = 6.8 Hz, 3H). <sup>13</sup>C

NMR (126 MHz, CDCl<sub>3</sub>)  $\delta$ : 199.0, 146.9, 140.2, 130.1, 116.5, 93.4, 85.5, 73.3, 28.5, 19.4, 17.7, 17.0. HRMS (ESI)  $m/z$ : calcd for C<sub>12</sub>H<sub>16</sub>O<sub>3</sub>Na (M+Na<sup>+</sup>) 231.0992, found: 231.0993.

**(1*S*,2*S*,4*S*,5*R*)-2-((*tert*-butyldimethylsilyloxy)-1-isopropyl-5-methyl-4-(2-oxobutyl)-8-oxabicyclo [3.2.1]oct-6-en-3-one (8)**

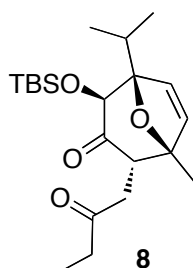

To a solution of **13** (1.30 g, 6.2 mmol) in DCM (62 mL) at 0 °C was added NEt<sub>3</sub> (4.3 mL, 31.0 mmol). Then TBSOTf (2.9 mL, 12.4 mmol) was added dropwise to the reaction mixture. The reaction mixture was then allowed to warm up to room temperature and stirred for 1 h at which time TLC showed no starting material. The reaction mixture was diluted in hexanes (150 mL), quenched with saturated NaHCO<sub>3</sub> solution (100 mL) and extracted with hexanes (2 x 100 mL). The combined organic layers were washed with brine (150 mL), dried over Na<sub>2</sub>SO<sub>4</sub>, filtered and concentrated under vacuum. Crude product purification using flash column chromatography (10:1, hexanes: EtOAc) afforded 1.96 g of corresponding TBS ether (98%) as a yellow solid. Propanaldehyde (1.7 mL, 24.4 mmol), TBS-ether (1.96 g, 6.1 mmol), catalyst **14** (329 mg, 1.2 mmol) and NEt<sub>3</sub> (1.0 mL, 7.3 mmol) were heated to 85 °C in a dry conical flask under argon atmosphere for 5 h. At this time TLC showed no starting material. The reaction mixture was diluted in EtOAc (150 mL), quenched with saturated NH<sub>4</sub>Cl solution (100 mL) and extracted with EtOAc (2 x 100 mL). The combined organic layers were washed with brine (100 mL), dried over Na<sub>2</sub>SO<sub>4</sub>, filtered and concentrated under vacuum. Crude product purification using flash column chromatography (1% to 15%, slow gradient, EtOAc/hexanes) afforded 1.78 g of diketone **8** (77%) as a yellow oil.

$[\alpha]_D^{23} = + 32.3$  (c 0.8,  $\text{CHCl}_3$ ).  $^1\text{H NMR}$  (500 MHz,  $\text{CDCl}_3$ )  $\delta$ : 6.05 (dd,  $J = 5.9, 0.6$  Hz, 1H), 5.92 (d,  $J = 6.0$  Hz, 1H), 3.78 (s, 1H), 3.57 (dd,  $J = 9.5, 3.8$  Hz, 1H), 2.69 - 2.55 (m, 2H), 2.52 - 2.42 (m, 1H), 2.37 - 2.29 (m, 1H), 2.10 (dd,  $J = 16.5, 3.8$  Hz, 1H), 1.44 (s, 3H), 1.08 (t,  $J = 7.3$  Hz, 3H), 0.94 (t,  $J = 7.1$  Hz, 6H), 0.90 (s, 9H), 0.10 (s, 3H), 0.01 (s, 3H).  $^{13}\text{C NMR}$  (126 MHz,  $\text{CDCl}_3$ )  $\delta$ : 208.6, 206.8, 138.9, 131.1, 93.7, 86.6, 74.9, 74.9, 54.6, 37.6, 36.4, 27.4, 25.9, 21.4, 18.3, 17.5, 17.3, 8.0, -4.8, -5.2. HRMS (ESI)  $m/z$ : calcd for  $\text{C}_{12}\text{H}_{16}\text{O}_3\text{Na}$  ( $\text{M}+\text{Na}^+$ ) 403.2275, found: 403.2278.

**(3*aR*,4*R*,7*S*,8*R*)-8-((*tert*-butyldimethylsilyloxy)-7-isopropyl-1,4-dimethyl-3*a*,4,7,8-tetrahydro-4,7-epoxyazulen-2(3*H*)-one (7).**

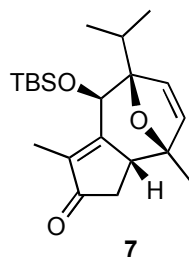

$\text{NaHMDS}$  (1.0 M in THF, 11.7 ml, 5 eq.) was added dropwise to a stirred solution of **8** (890 mg, 2.34 mmol) in dry THF (3.6 ml) at 0 °C. This reaction was stirred for 2 hours at this temperature before quenched with saturated  $\text{NH}_4\text{Cl}$  solution. Then the mixture was extracted with ethyl acetate (3 x 30 mL), the combined organic extracts were washed with brine, dried over  $\text{Na}_2\text{SO}_4$ , and the solvent was evaporated to give a crude product which was purified by flash chromatography on silica gel (2% to 25% EtOAc/hexanes) gave 400 mg of aldol product (70% b.r.s.m.) and 250 mg recovered **8**. This aldol product was dissolved in anhydrous methanol (8 mL), and sodium methoxide (75 mg, 1.3 eq.) was quickly added in one portion. The flask was immersed in an oil bath which has pre-heated to 65 °C and stirred for 10 minutes, at which time TLC showed no starting material. This reaction was cooled to 0 °C and quenched with saturated  $\text{NH}_4\text{Cl}$  solution. Then this mixture was extracted with ethyl acetate (3 x 30 mL), the combined organic extracts were washed with brine, dried over  $\text{Na}_2\text{SO}_4$ , and the solvent was evaporated to give a crude product which was purified by flash chromatography on silica gel (2% to

25% EtOAc/hexanes) gave 303 mg of **7** (43% b.r.s.m. over 2 steps) as an oil.

$[\alpha]_D^{23} = +188.5$  (c 0.6,  $\text{CHCl}_3$ ).  $^1\text{H NMR}$  ( $\text{CDCl}_3$ , 500 MHz)  $\delta$ : 5.90 (d,  $J = 5.7$  Hz, 1H), 5.84 (d,  $J = 5.7$  Hz, 1H), 4.50 (s, 1H), 3.05 (m, 1H), 2.49 (dd,  $J = 18.9$  Hz,  $J = 6.9$  Hz, 1H), 2.34 (hept,  $J = 6.9$  Hz, 1H), 1.71 (dd,  $J = 18.9$  Hz,  $J = 3.5$  Hz, 1H), 1.71 (m, 4H), 1.44 (s, 3H), 1.00 (d,  $J = 6.9$  Hz, 3H), 0.90 (d,  $J = 6.9$  Hz, 3H), 0.86 (s, 9H), 0.12 (s, 3H), -0.01 (s, 3H).  $^{13}\text{C NMR}$  ( $\text{CDCl}_3$ , 126 MHz)  $\delta$ : 208.9, 171.0, 138.0, 135.7, 132.1, 94.4, 87.2, 64.9, 45.5, 36.2, 27.8, 25.7, 21.7, 21.0, 18.3, 17.5, 17.4, 8.6, -4.5, -4.7. HRMS (ESI)  $m/z$ : calcd for  $\text{C}_{21}\text{H}_{34}\text{O}_3\text{SiNa}$  ( $\text{M}+\text{Na}^+$ ) 385.2169, found: 385.2173.

**(((2*S*,3*aR*,4*R*,7*S*,8*R*)-2-(benzyloxy)-7-isopropyl-1,4-dimethyl-2,3,3*a*,4,7,8-hexahydro-4,7-epoxy-azulen-8-yl)oxy)(*tert*-butyl)dimethylsilane (**15**).**

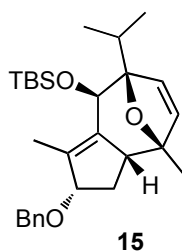

$\text{NaBH}_4$  (160 mg, 5 eq.) was added portionwise to a stirred solution of **7** (303 mg, 0.84 mmol) in anhydrous methanol (4 mL) at 0 °C. The ice bath was removed and this reaction was stirred for 15 min at room temperature before carefully quenched with saturated  $\text{NH}_4\text{Cl}$  solution. This mixture was extracted with ethyl acetate (3 x 30 mL), the combined organic extracts were washed with brine, dried over  $\text{Na}_2\text{SO}_4$ , and the solvent was evaporated and dried under high vacuum to give the corresponding allylic alcohol, which was clean enough to be used directly in next step. The allylic alcohol was dissolved in anhydrous DMF (8 mL), and sodium hydride (134 mg, 4 eq., 60% in mineral oil) was added in one portion at 0 °C. The reaction was stirred at 0 °C for 5 min before benzyl bromide was added dropwise (800  $\mu\text{L}$ , 8 eq.). This reaction was then heated to 60 °C for 20 minutes, at which time TLC showed no starting material. This reaction was cooled to 0 °C and quenched with saturated  $\text{NH}_4\text{Cl}$  solution. Then this mixture was extracted with ethyl acetate (3 x 30 mL), the combined organic extracts were washed



with brine, dried over Na<sub>2</sub>SO<sub>4</sub>, and the solvent was evaporated to give a crude product which was purified by flash chromatography on silica gel (hexanes to 5% EtOAc/hexanes) gave about 350 mg of the product (contaminated with dibenzylether, contains 271 mg of **15**, 71% over 2 steps based on <sup>1</sup>H NMR analysis) as a colorless oil.  $[\alpha]_D^{25} = + 58.2$  (c 0.86, CHCl<sub>3</sub>). <sup>1</sup>H NMR (CDCl<sub>3</sub>, 500 MHz)  $\delta$ : 7.32 - 7.27 (m, 5H), 5.90 (d,  $J = 6.0$  Hz, 1H), 5.87 (d,  $J = 6.0$  Hz, 1H), 4.55 - 4.44 (m, 2H), 4.40 (t,  $J = 7.2$  Hz, 1H), 4.25 (s, 1H), 2.74 (t,  $J = 8.1$  Hz, 1H), 2.35 (dt,  $J = 12.5, 7.4$  Hz, 1H), 2.27 (dt,  $J = 13.8, 7.0$  Hz, 1H), 1.73 (d,  $J = 1.0$  Hz, 3H), 1.36 (s, 4H), 0.98 (d,  $J = 6.9$  Hz, 5H), 0.88 (d,  $J = 6.9$  Hz, 6H), 0.86 (s, 9H), 0.06 (s, 3H), -0.02 (s, 3H). <sup>13</sup>C NMR (CDCl<sub>3</sub>, 126 MHz)  $\delta$ : 138.8, 138.4, 138.3, 137.2, 136.7, 131.6, 127.6, 94.2, 87.3, 86.2, 71.2, 64.3, 49.0, 32.4, 28.2, 25.9, 21.4, 18.4, 17.6, 17.5, 11.7, 1.12, -4.3, -4.4. HRMS (ESI)  $m/z$ : calcd for C<sub>28</sub>H<sub>42</sub>O<sub>3</sub>SiNa (M+Na<sup>+</sup>) 477.2795, found: 477.2794.

**(2*S*,4*S*,5*R*,7*R*,8*R*)-5,8-bis((*tert*-butyldimethylsilyl)oxy)-7-isopropyl-1,4-dimethyl-2,3,3*a*,4,5,6,7,8-octahydro-4,7-epoxyazulen-2-ol(**16**).**

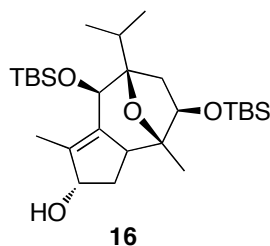

To a solution of **15** (150 mg, 0.33 mmol) in dry THF was added borane-THF complex (1 mL, 1.0 M in THF, 3 eq.) dropwise at 0 °C. The reaction was then stirred at room temperature for 1.5 h, at which time TLC showed no starting material. The reaction was cooled to 0°C, then was carefully added a pre-mixed solution of 3N NaOH and 30% H<sub>2</sub>O<sub>2</sub> (3 mL, 1 : 1), the ice bath was removed and the reaction was stirred at ambient temperature for 1 h, at which time TLC showed no starting material. The reaction was quenched with saturated NH<sub>4</sub>Cl solution, then this mixture was extracted with ethyl acetate (3 x 30 mL), the combined organic extracts were washed with brine, dried over Na<sub>2</sub>SO<sub>4</sub>, and the solvent was evaporated to give a crude product which was purified by

flash chromatography on silica gel (5% to 40% EtOAc/hexanes) gave 94 mg (60%) of the desired C-9  $\beta$ -alcohol. The C-9  $\beta$ -alcohol (0.20 mmol) and triethylamine (110  $\mu$ L, 4 eq.) was then dissolved in dry dichloromethane (2 mL), then TBS-triflate (92  $\mu$ L, 2 eq.) was added dropwise at 0  $^{\circ}$ C. This reaction was then stirred at room temperature for 1 h before quenched with saturated NaHCO<sub>3</sub> solution. The mixture was extracted with hexanes (3 x 30 mL), the combined organic extracts were washed with brine, dried over Na<sub>2</sub>SO<sub>4</sub>, and the solvent was evaporated to give 114 mg of crude product which was used directly in the next step. The crude product (114 mg, 0.194 mmol) was dissolved in methanol (2 mL) and Pd(OH)<sub>2</sub> (11 mg, 10%) was added. After hydrogenation at atmospheric pressure for 1 h, the mixture was filtered through Celite and the solvent was removed in *vacuo*. The residue was purified by column chromatography on silica gel (2% to 10% EtOAc/hexanes) to give alcohol **16** (97 mg, 100%) as a colorless oil.

$[\alpha]_D^{23} = -2.52$  (c 1.3, CHCl<sub>3</sub>). <sup>1</sup>H NMR (CDCl<sub>3</sub>, 500 MHz)  $\delta$ : 4.71 - 4.64 (m, 1H), 4.06 (s, 1H), 3.98 (d,  $J = 2.0$  Hz, 1H), 2.83 (t,  $J = 5.6$  Hz, 1H), 2.44 - 2.37 (m, 1H), 1.75 (dd,  $J = 2.3, 1.0$  Hz, 1H), 1.56 (dd,  $J = 13.5, 2.0$  Hz, 1H), 1.49 - 1.44 (m, 1H), 1.19 - 1.13 (m, 1H), 0.97 (d,  $J = 6.8$  Hz, 1H), 0.88 (s, 2H), 0.86 (s, 2H), 0.82 (d,  $J = 7.0$  Hz, 1H), 0.06 (s, 1H), 0.03 (d,  $J = 3.0$  Hz, 2H), -0.04 (s, 1H). <sup>13</sup>C NMR (CDCl<sub>3</sub>, 126 MHz)  $\delta$ : 137.5, 135.8, 88.1, 87.3, 79.9, 72.4, 67.4, 50.4, 39.0, 34.3, 28.1, 25.9, 25.9, 26.1, 19.5, 18.4, 18.1, 17.8, 16.2, 11.3, -4.4, -4.4, -4.5, -4.8. HRMS (ESI)  $m/z$ : calcd for C<sub>27</sub>H<sub>52</sub>O<sub>4</sub>Si<sub>2</sub>Na (M+Na<sup>+</sup>) 519.3296, found: 519.3294.

**(((3a*R*,4*S*,5*R*,7*R*,8*R*)-7-isopropyl-1,4-dimethyl-2,3,3a,4,5,6,7,8-octahydro-4,7-epoxyazulene-5,8-diyl)bis(oxy))bis(*tert*-butyldimethylsilane) (18).**

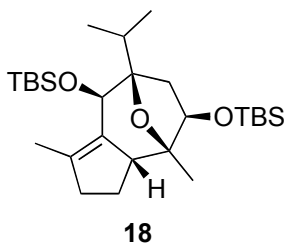

**16** (97 mg, 0.194 mmol) was dissolved in anhydrous toluene (2 mL) and Burgess reagent (233 mg, 5 eq.) was added. This reaction was heated to 80 °C for 30 min, at which time TLC showed no starting material. Then this reaction was cooled and quenched with water, extracted with ethyl acetate (3 x 30 mL), the combined organic extracts were washed with brine, dried over Na<sub>2</sub>SO<sub>4</sub>, and the solvent was evaporated to give a crude product which was dissolved directly in methanol (2 mL) and Pd/C (9 mg, 10%) was added. After hydrogenation at atmospheric pressure for 1 h, the mixture was filtered through Celite and the solvent was removed in *vacuo*. The residue was purified by column chromatography on silica gel (hexanes to 5% EtOAc/hexanes) to give **18** (84 mg, 90% over 2 steps) as a colorless oil.

$[\alpha]_D^{23} = +3.98$  (c 0.6, CHCl<sub>3</sub>). <sup>1</sup>H NMR (CDCl<sub>3</sub>, 500 MHz)  $\delta$ : 4.03 (s, 1H), 3.76 (dd,  $J = 7.2, 2.0$  Hz, 1H), 3.01 - 2.87 (m, 1H), 2.47 - 2.36 (m, 1H), 2.31 (m, 1H), 2.25 - 2.17 (m, 1H), 1.93 (m, 1H), 1.73 - 1.66 (m, 3H), 1.58 (s, 3H), 1.49 (dd,  $J = 13.4, 2.1$  Hz, 1H), 1.38 (dd,  $J = 13.4, 7.2$  Hz, 1H), 1.15 (s, 3H), 0.95 (d,  $J = 6.8$  Hz, 3H), 0.87 (s, 9H), 0.85 (s, 8H), 0.80 (d,  $J = 7.0$  Hz, 3H), 0.03 (s, 2H), 0.00 (s, 2H), -0.00 (s, 2H), -0.05 (s, 2H). <sup>13</sup>C NMR (CDCl<sub>3</sub>, 126 MHz)  $\delta$ : 134.2, 134.1, 88.1, 87.7, 72.6, 67.6, 52.7, 39.2, 37.8, 29.9, 28.1, 26.0, 25.9, 22.9, 18.4, 18.2, 17.8, 16.4, 14.3, -4.5, -4.5, -4.6, -4.9 HRMS (ESI)  $m/z$ : calcd for C<sub>29</sub>H<sub>36</sub>O<sub>4</sub>Na (M+Na<sup>+</sup>) 503.3347, found: 503.3350.

**(3a*R*,4*S*,5*R*,7*R*,8*R*)-7-isopropyl-1,4-dimethyl-2,3,3a,4,5,6,7,8-octahydro-4,7-epoxyazulene-5,8-diol ((+)-6).**

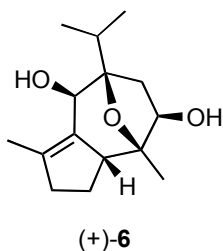

**18** (48.1 mg, 0.1 mmol) and TBAF (1.0 M in THF, 0.3 mL, 3 eq.) was dissolved in dry THF (2 mL) in a sealed tube. This tube was then microwaved at 80 °C for 45 minutes. The reaction was then cooled to ambient temperature, quenched with pH = 7.0 buffer, Then this mixture was extracted with ethyl acetate (3 x 30 mL), the combined organic

extracts were washed with brine, dried over Na<sub>2</sub>SO<sub>4</sub>, and the solvent was evaporated to give a crude product which was purified by flash chromatography on silica gel (5% to 50% EtOAc/hexanes) to give 23 mg of (+)-**6** (93%) as a colorless oil.

$[\alpha]_D^{23} = +17.5$  (c 0.2, CHCl<sub>3</sub>). <sup>1</sup>H NMR (CDCl<sub>3</sub>, 500 MHz)  $\delta$ : 4.06 (s, 1H), 3.89 (dd,  $J = 7.4$  Hz,  $J = 1.5$  Hz, 1H), 2.96 (m, 1H), 2.43 - 2.36 (m, 2H), 2.27 - 2.21 (m, 1H), 2.08 (br, 1H), 2.01 - 1.95 (m, 1H), 1.71 (br, s, 1H), 1.68 - 1.57 (m, 2H), 1.40 - 1.32 (m, 1H), 1.26 (m, 1H), 1.24 (s, 3H), 0.98 (d,  $J = 6.9$  Hz, 3H), 0.90 (d,  $J = 6.9$  Hz, 3H). <sup>13</sup>C NMR (CDCl<sub>3</sub>, 126 MHz)  $\delta$ : 136.8, 132.7, 88.3, 87.3, 72.5, 66.9, 52.1, 39.0, 37.5, 28.3, 23.5, 19.2, 17.8, 16.3, 13.6. HRMS (ESI)  $m/z$ : calcd for C<sub>15</sub>H<sub>24</sub>O<sub>3</sub>Na (M+Na<sup>+</sup>) 275.1618, found: 275.1619.

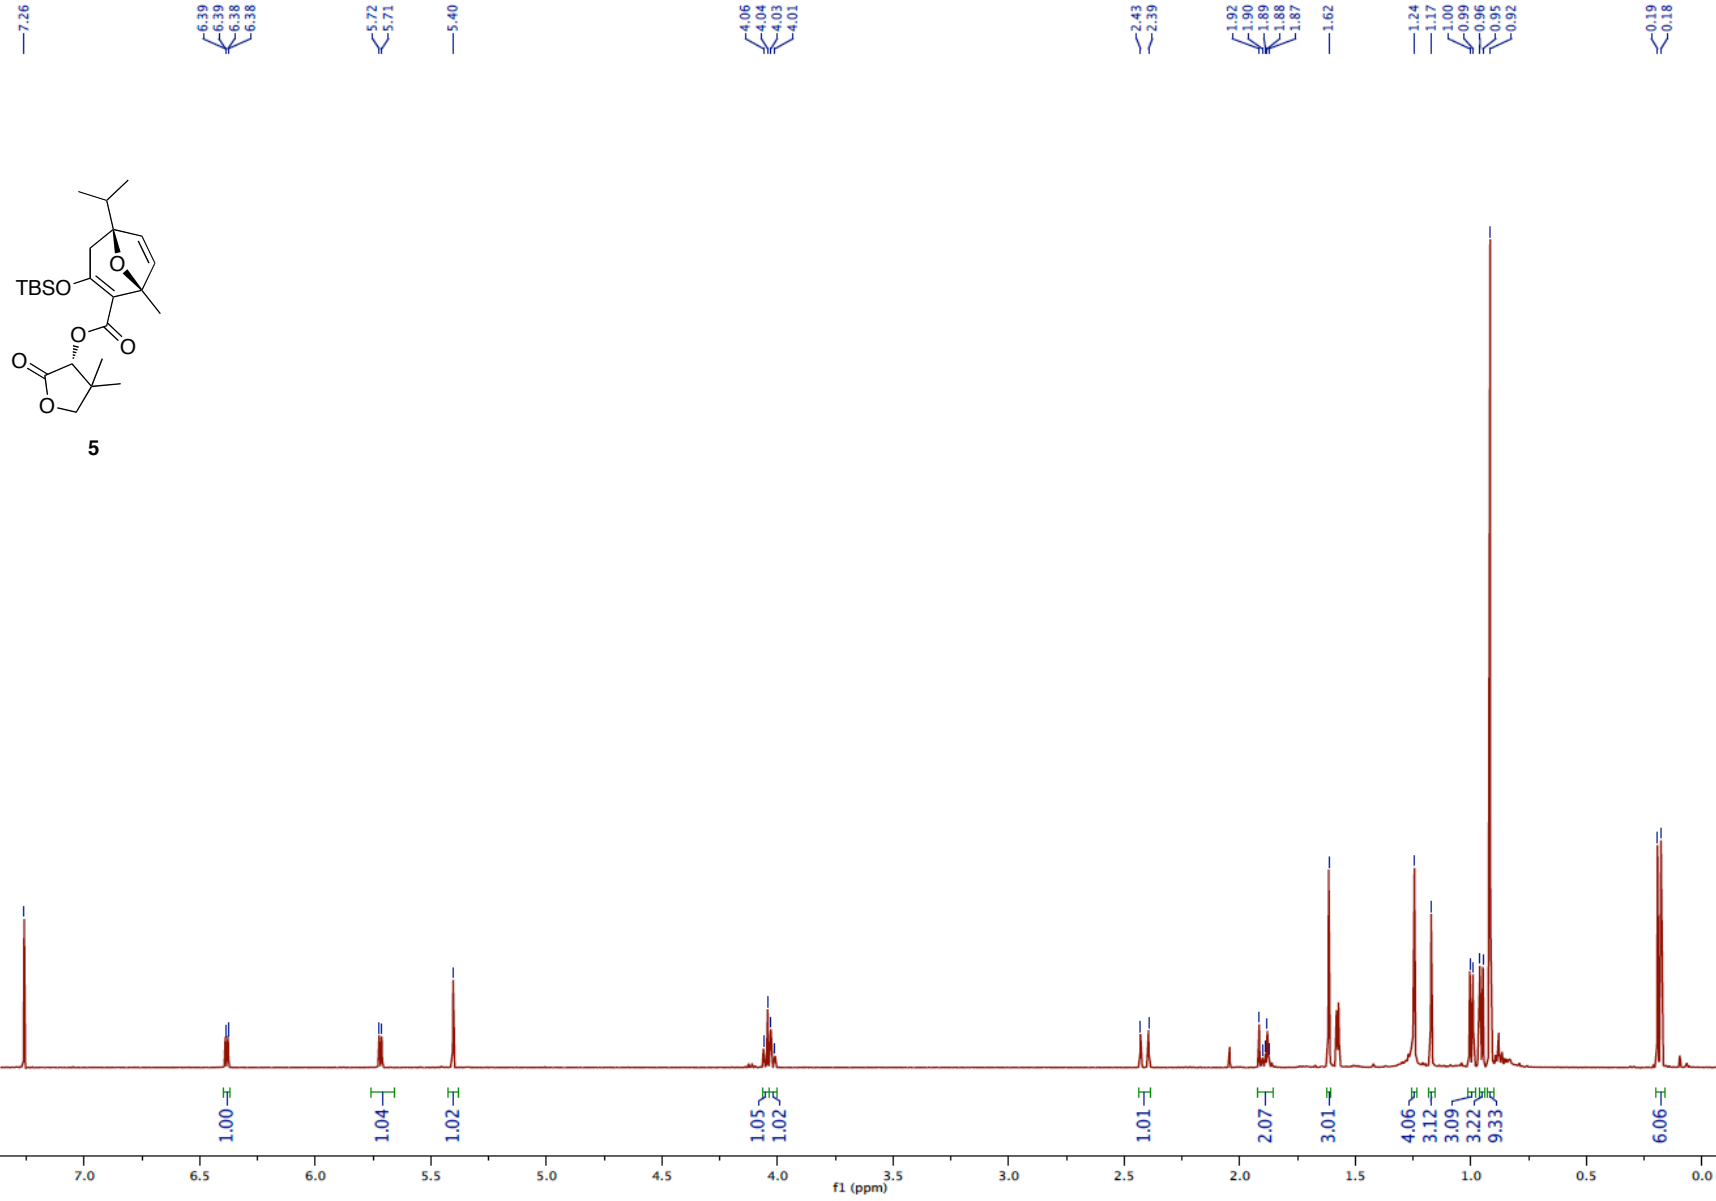

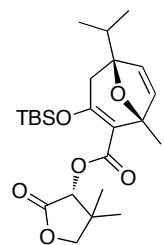

5

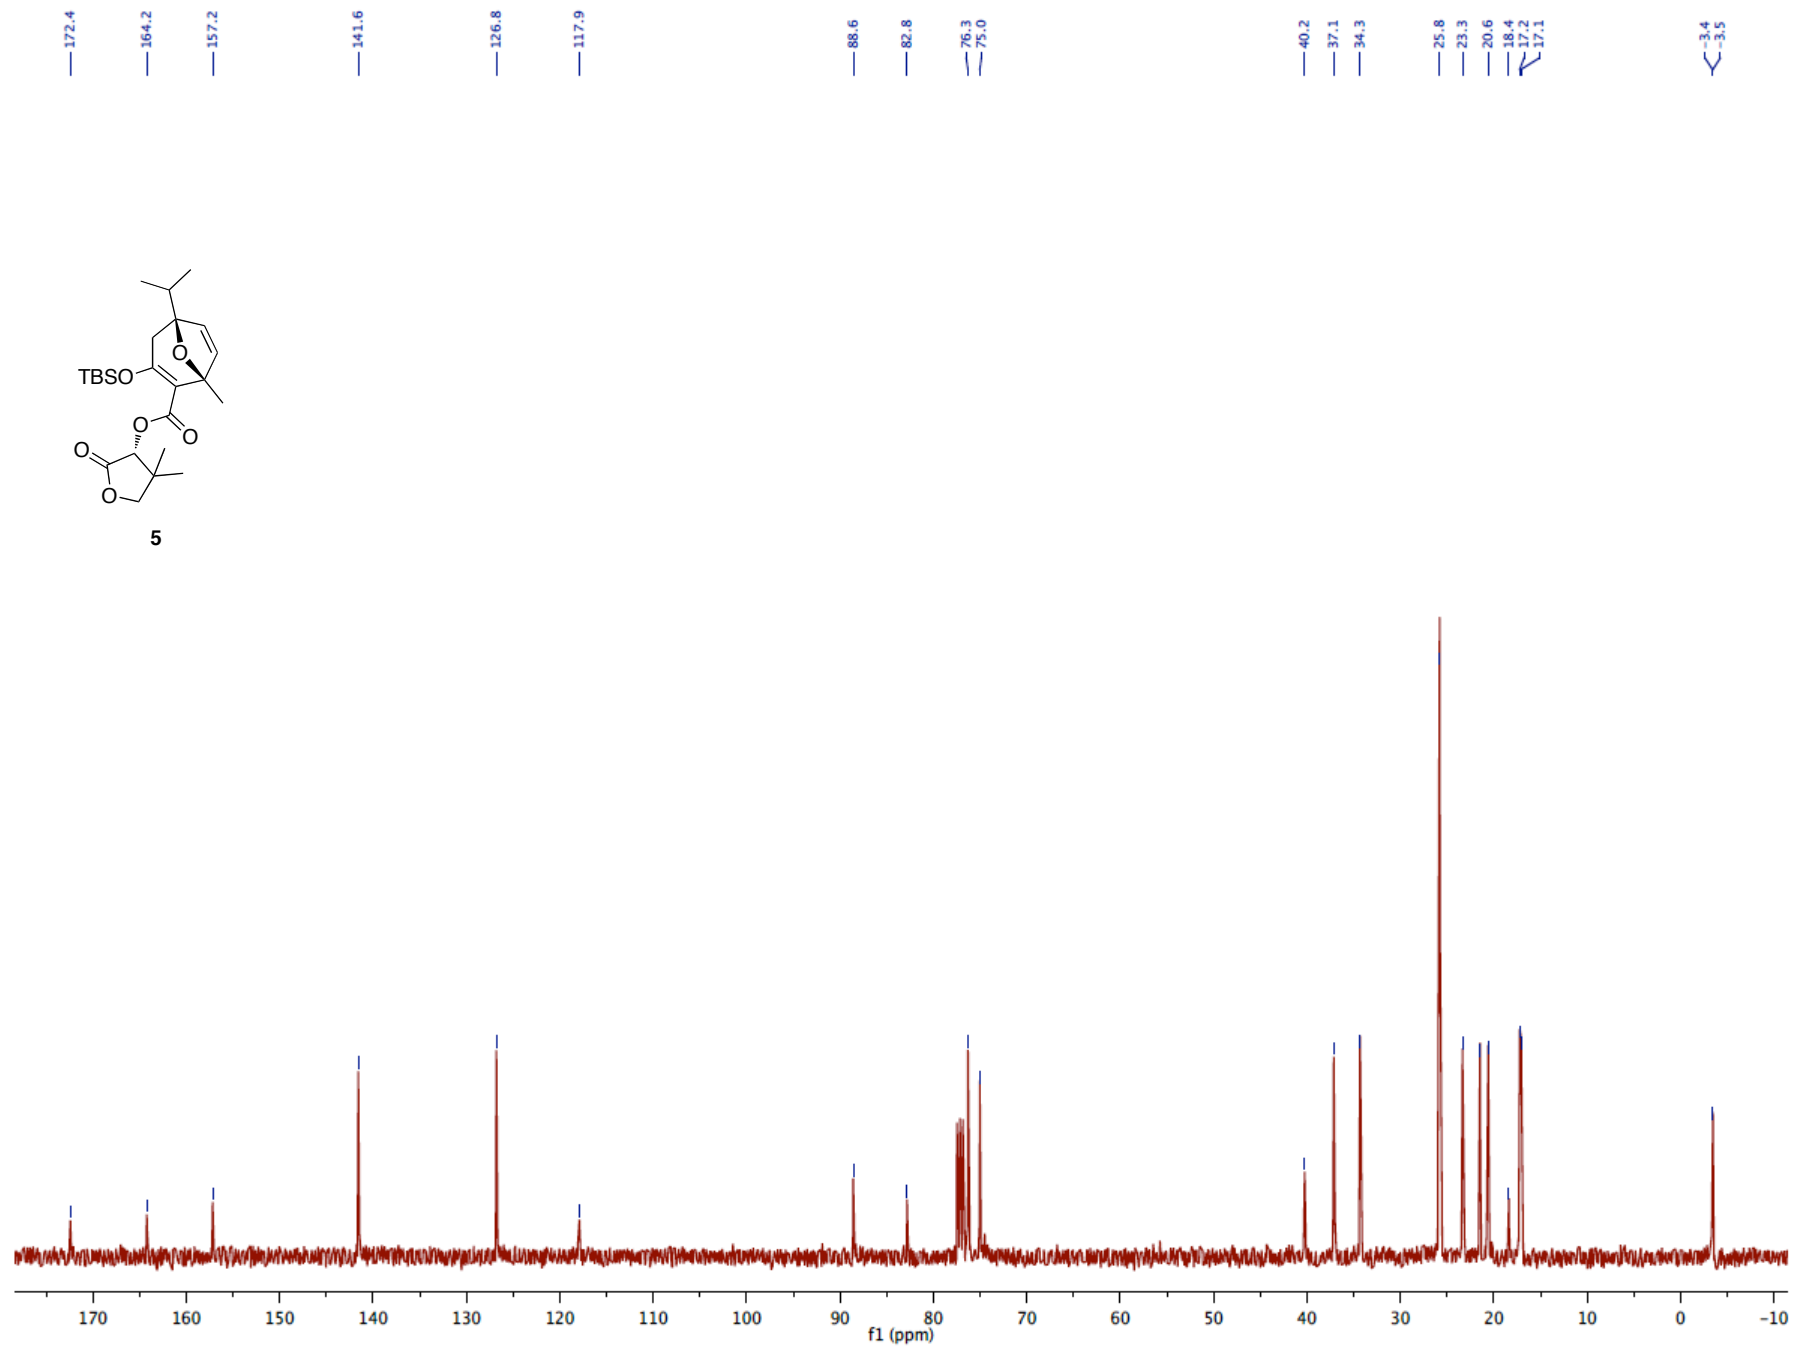

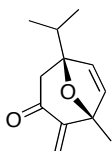

12

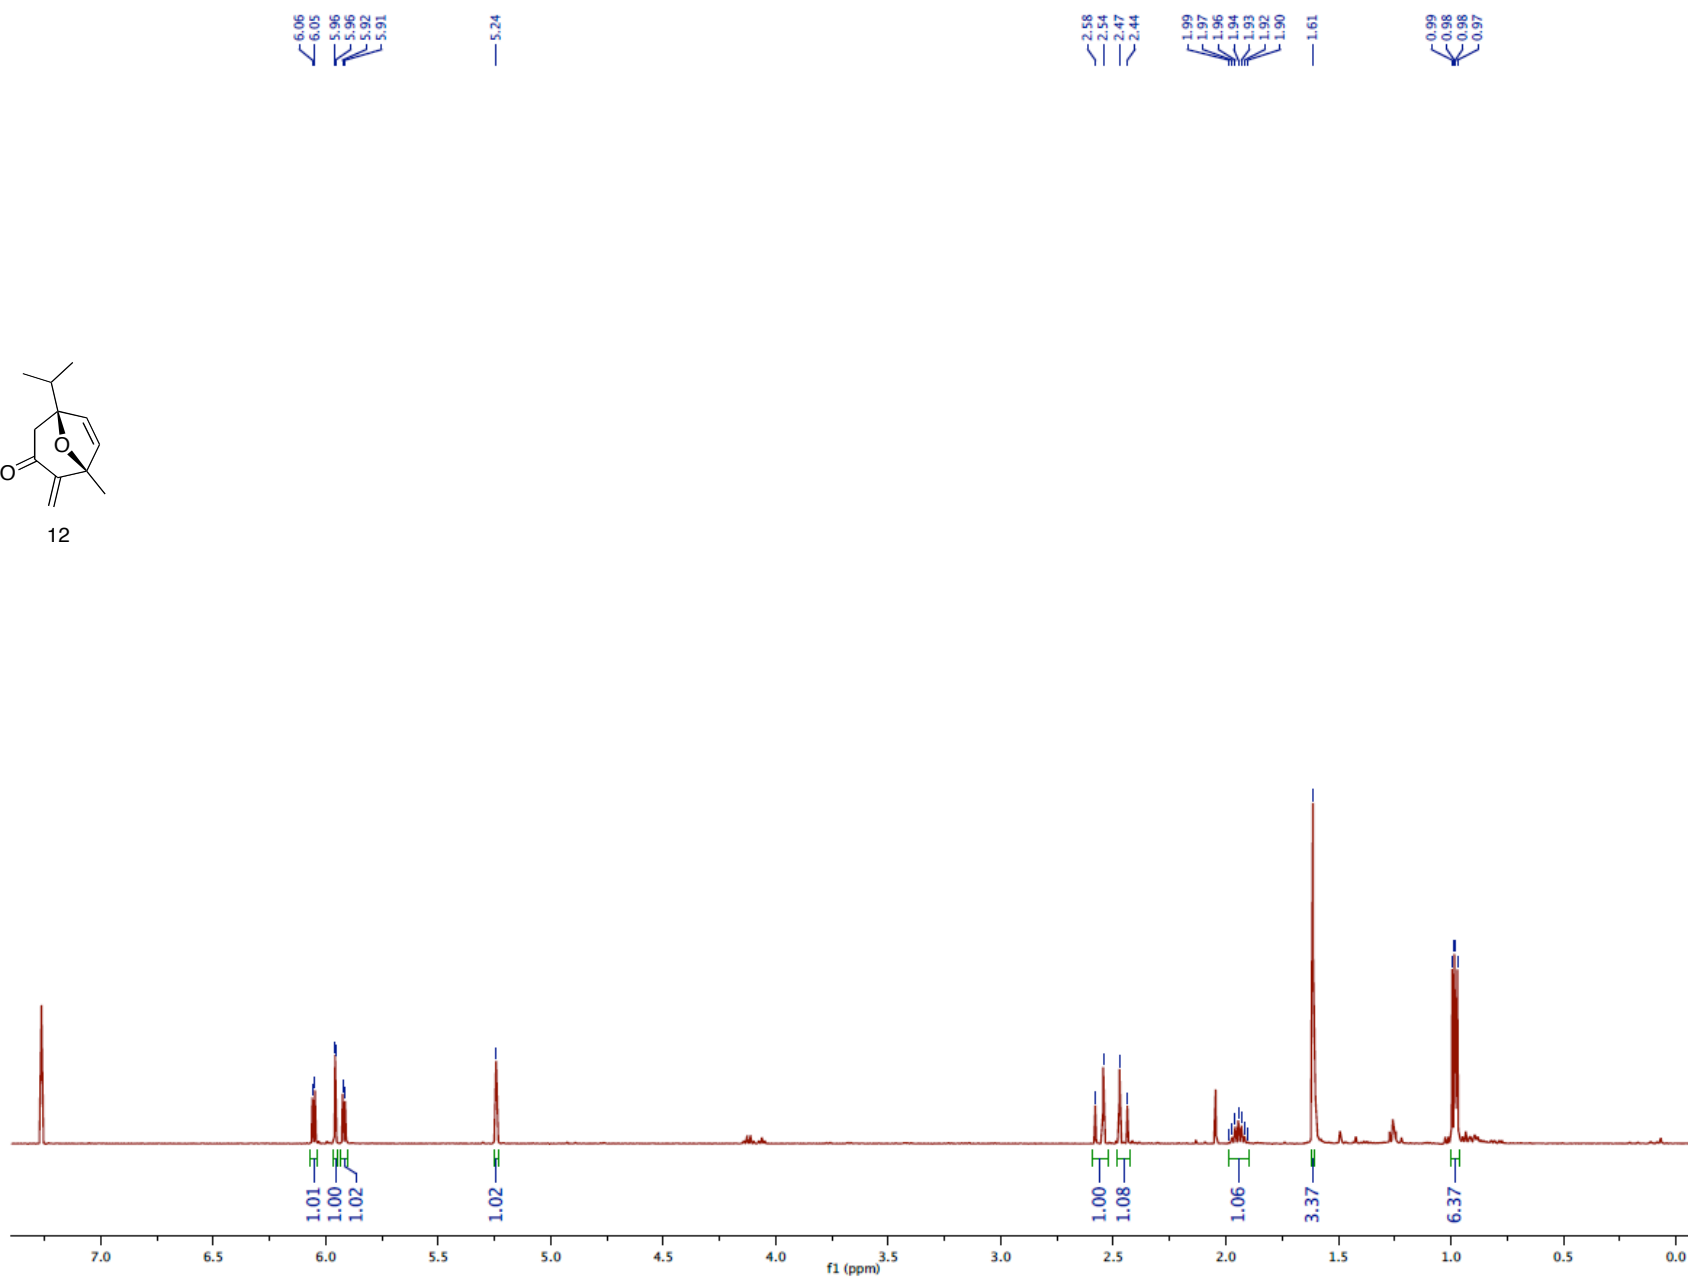

—197.7

—147.3

—136.2

—133.4

—115.2

—89.7

—84.8

—45.8

—33.6

—19.8

—17.2

—17.2

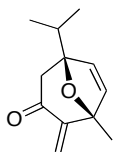

12

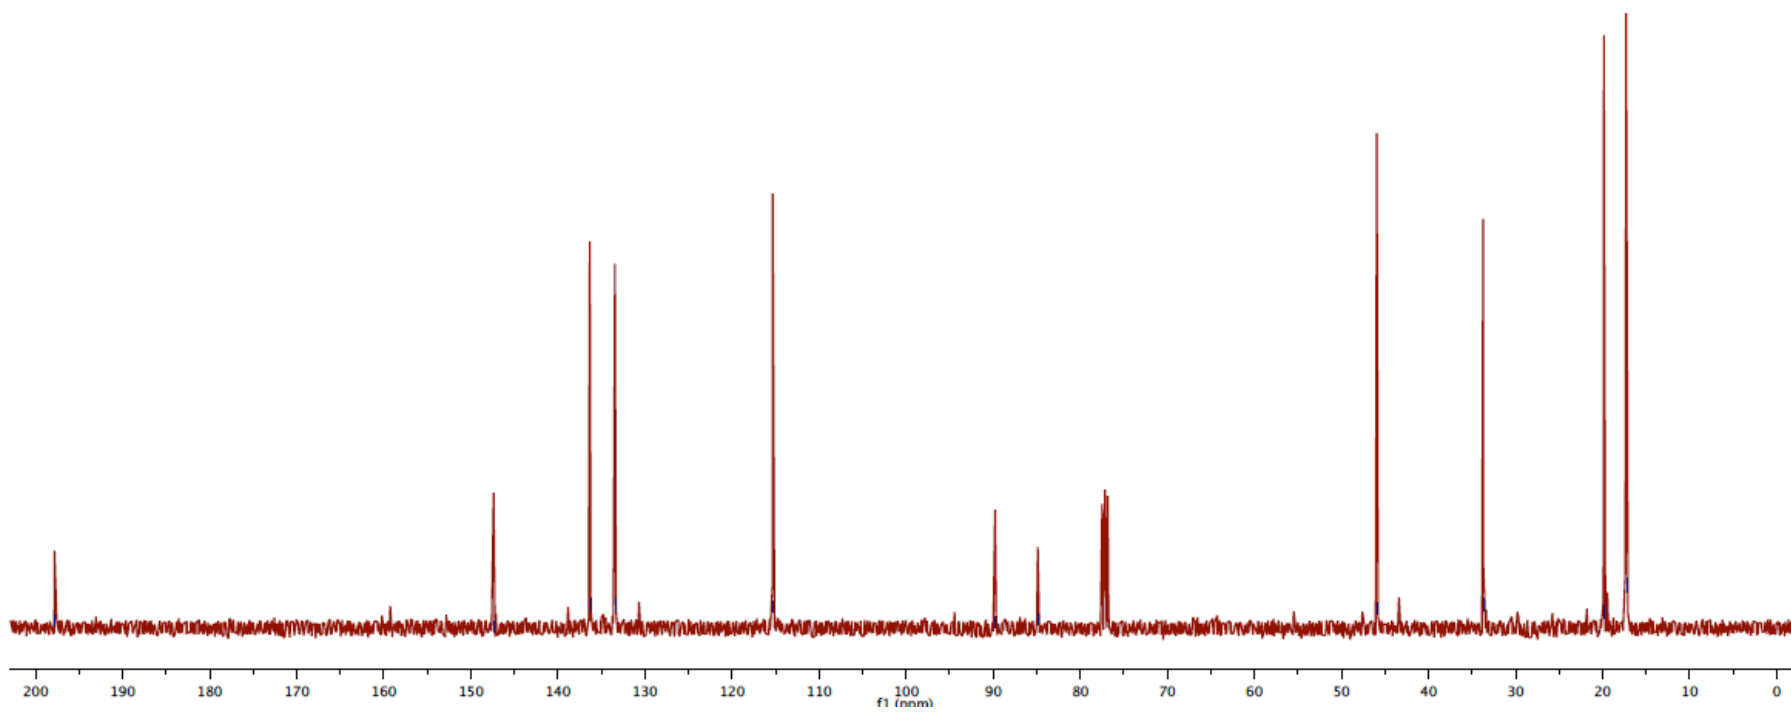



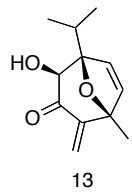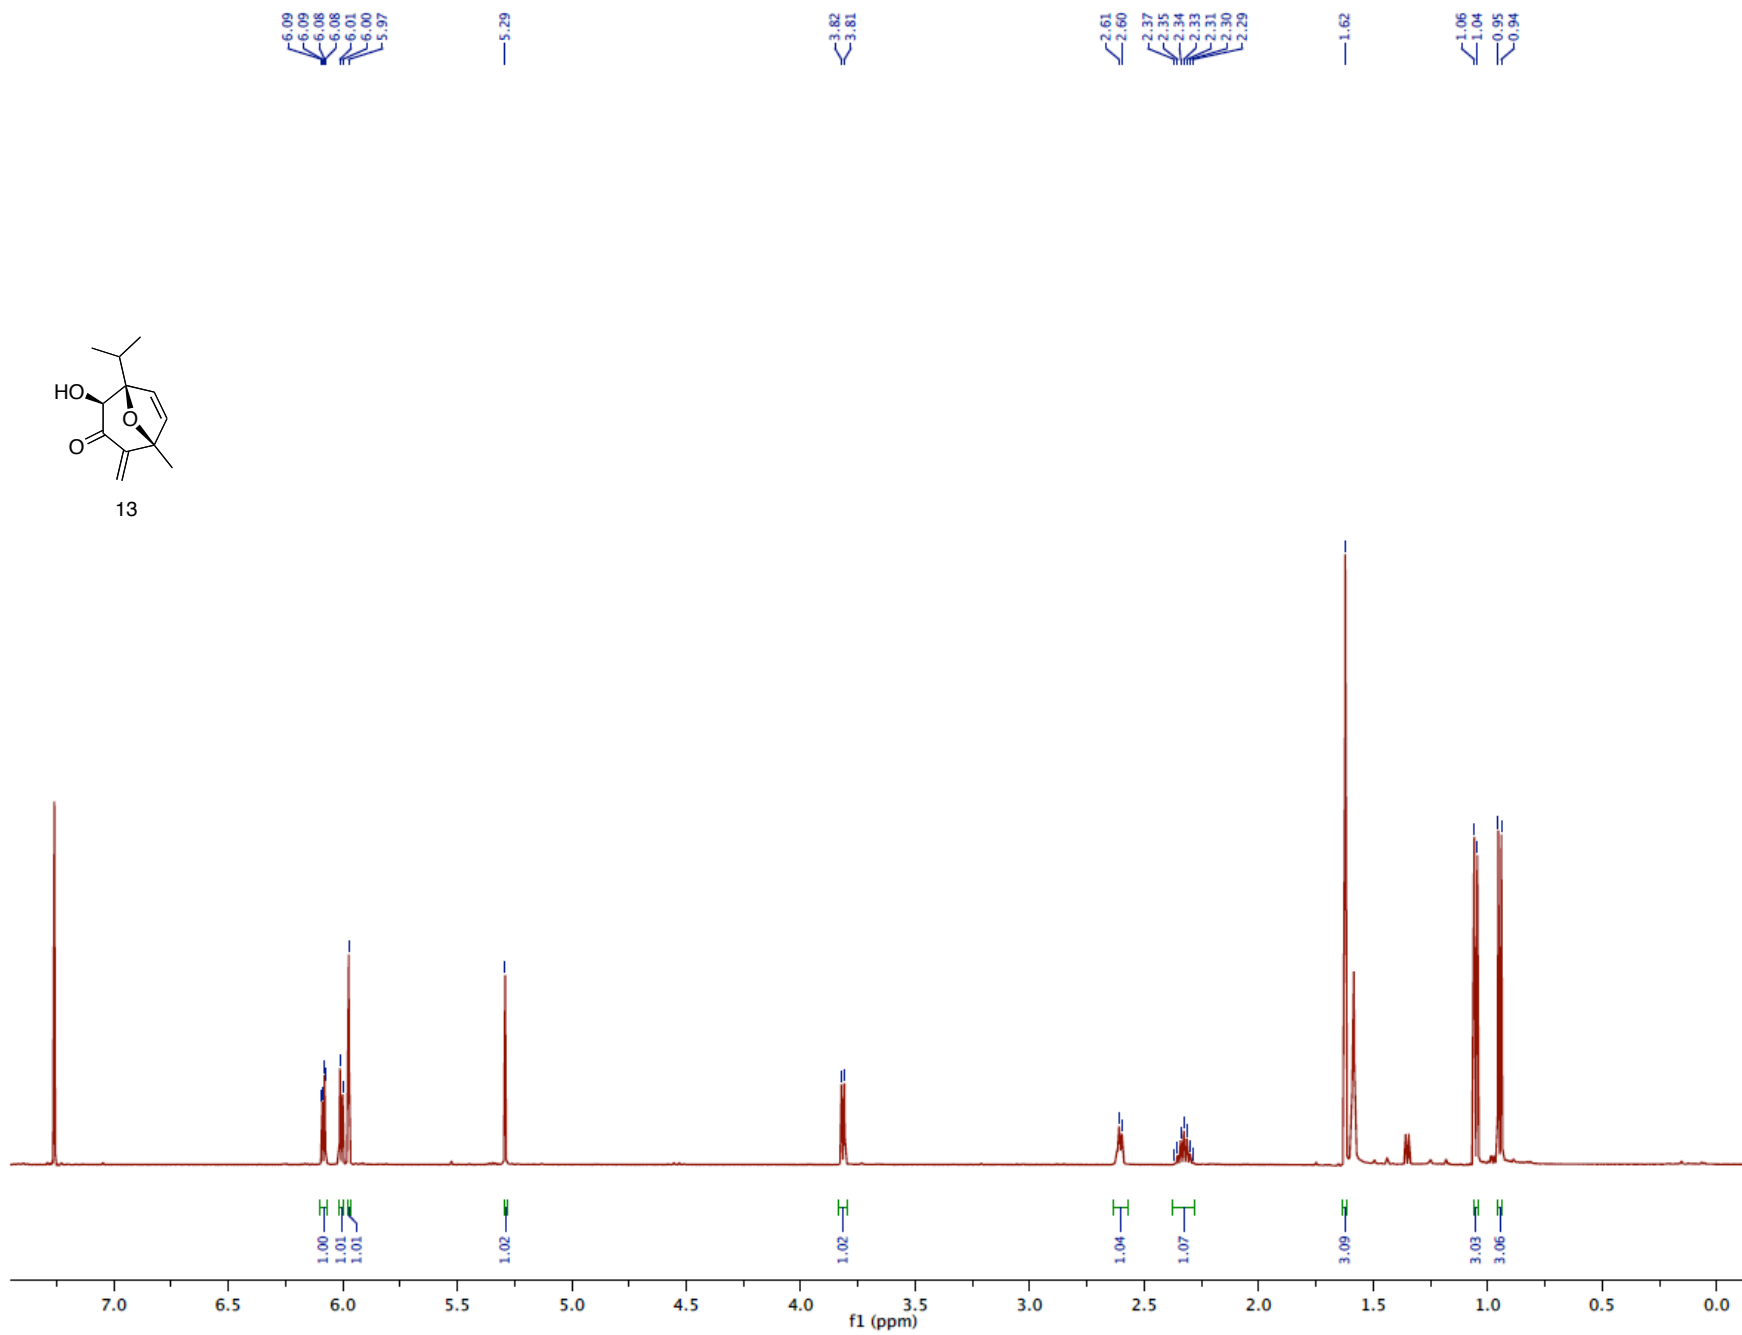

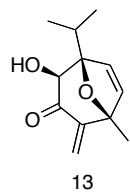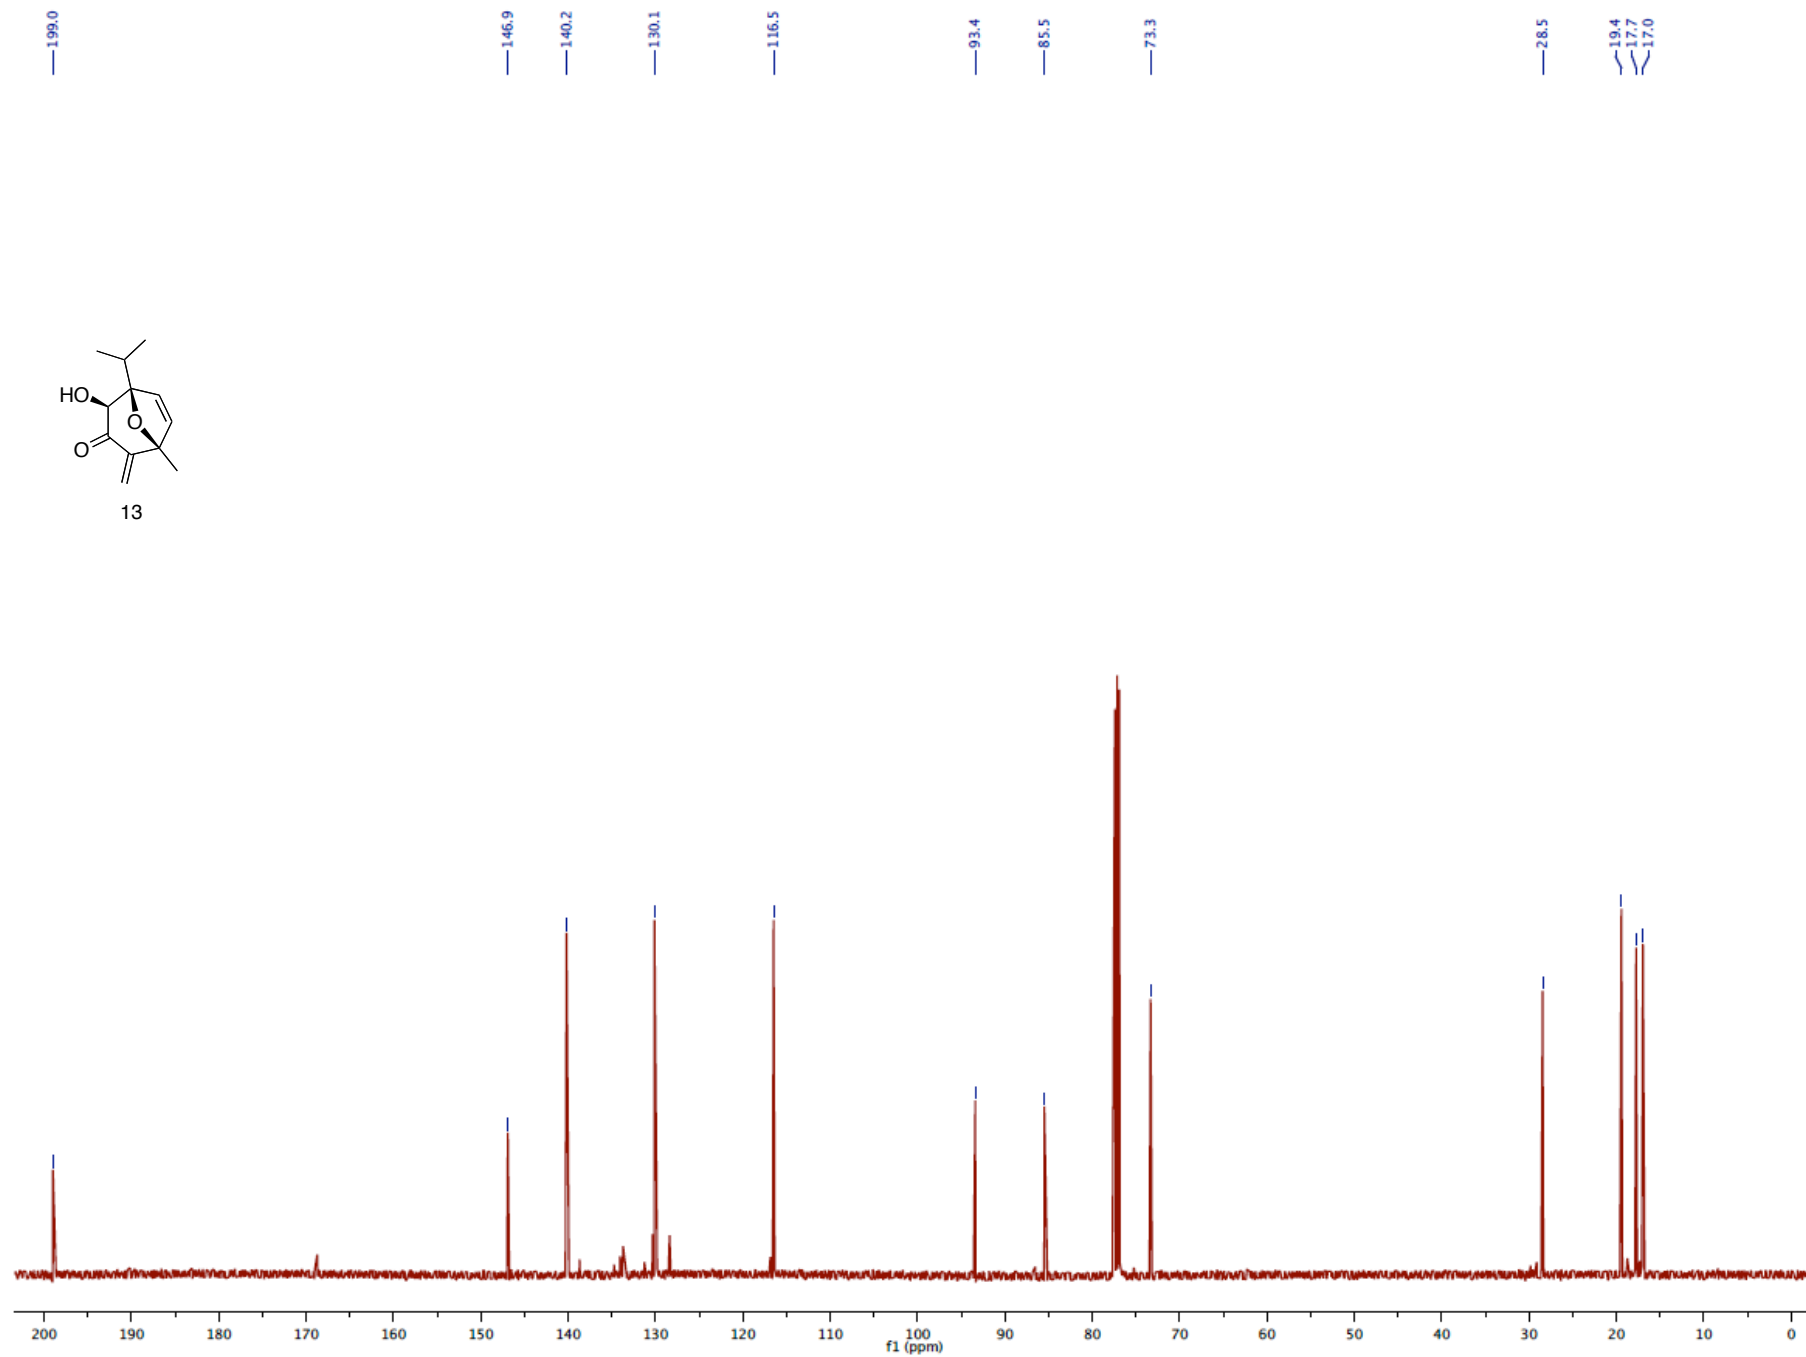

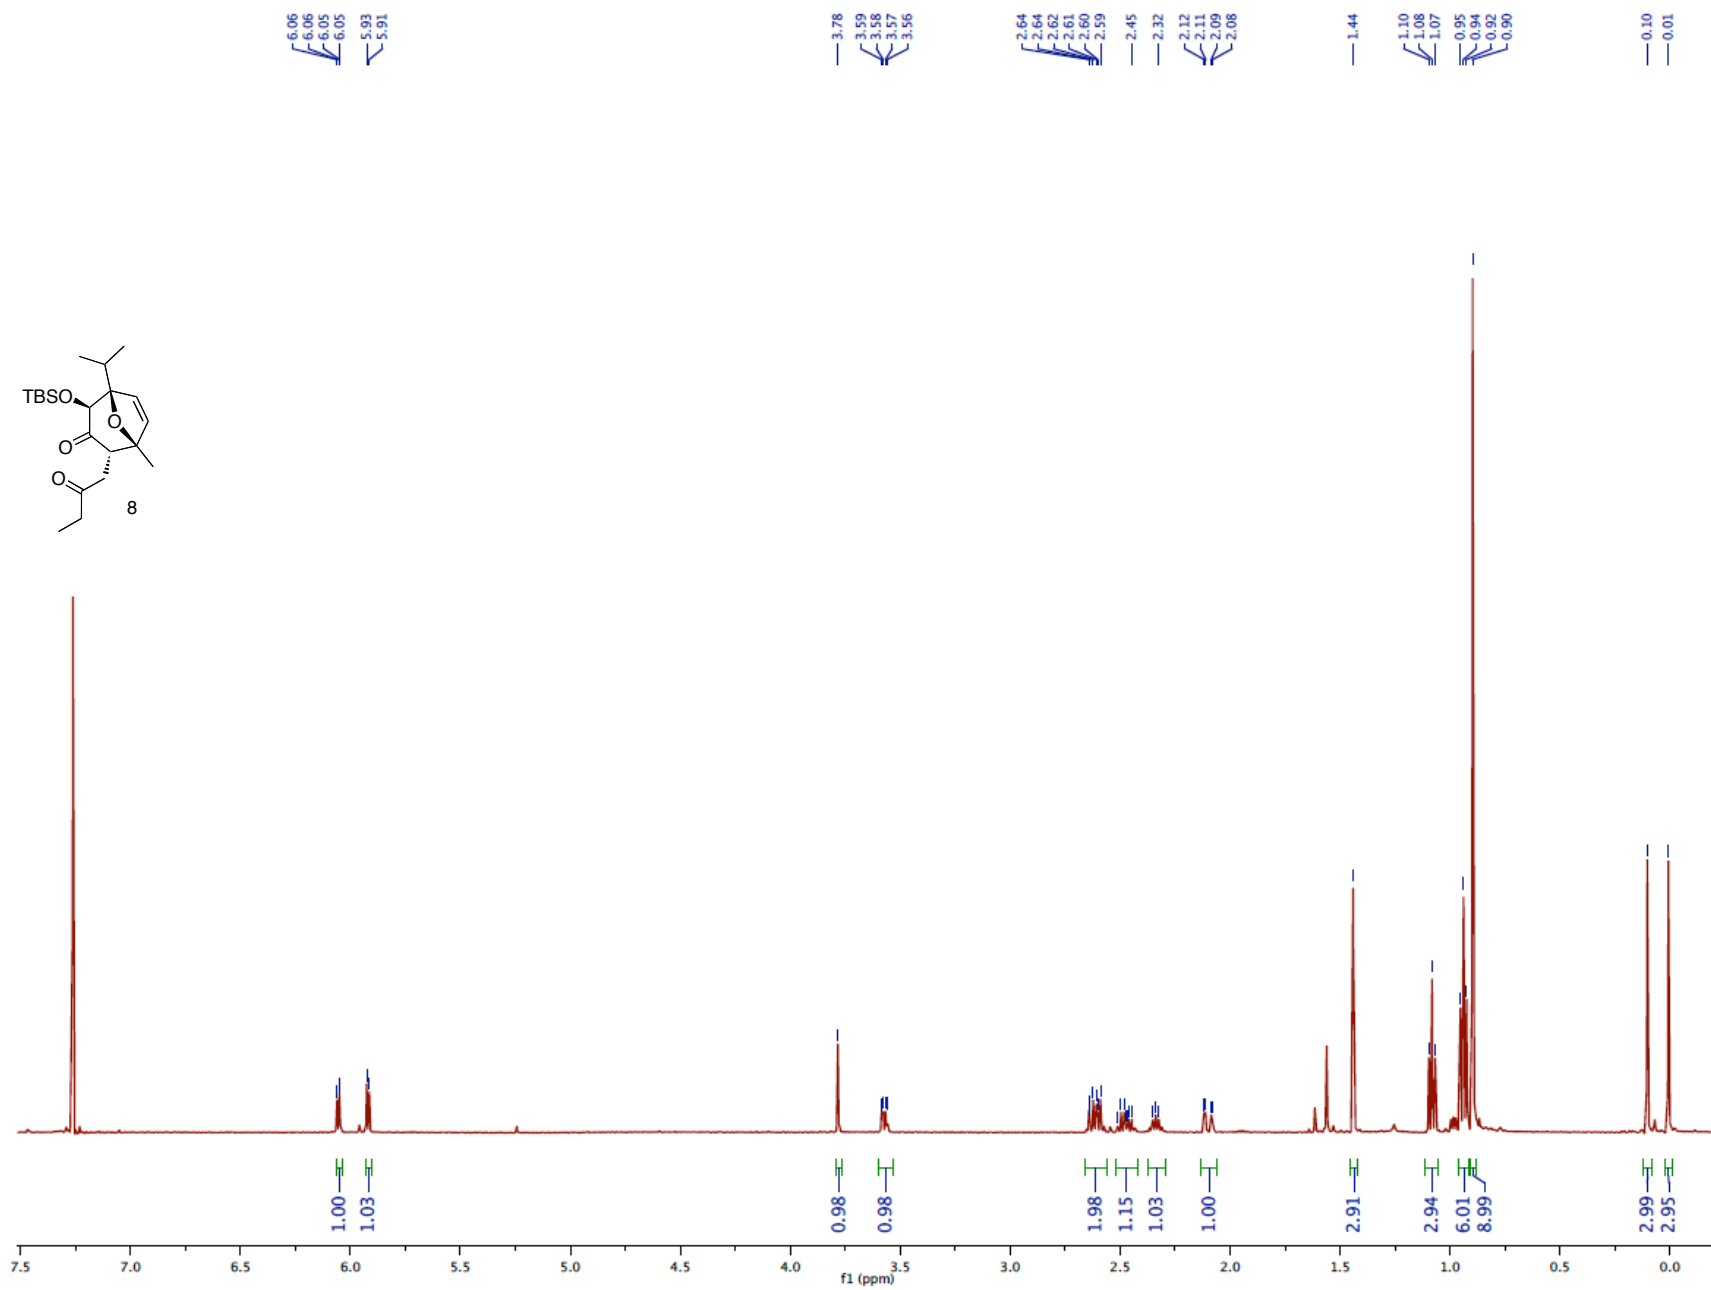

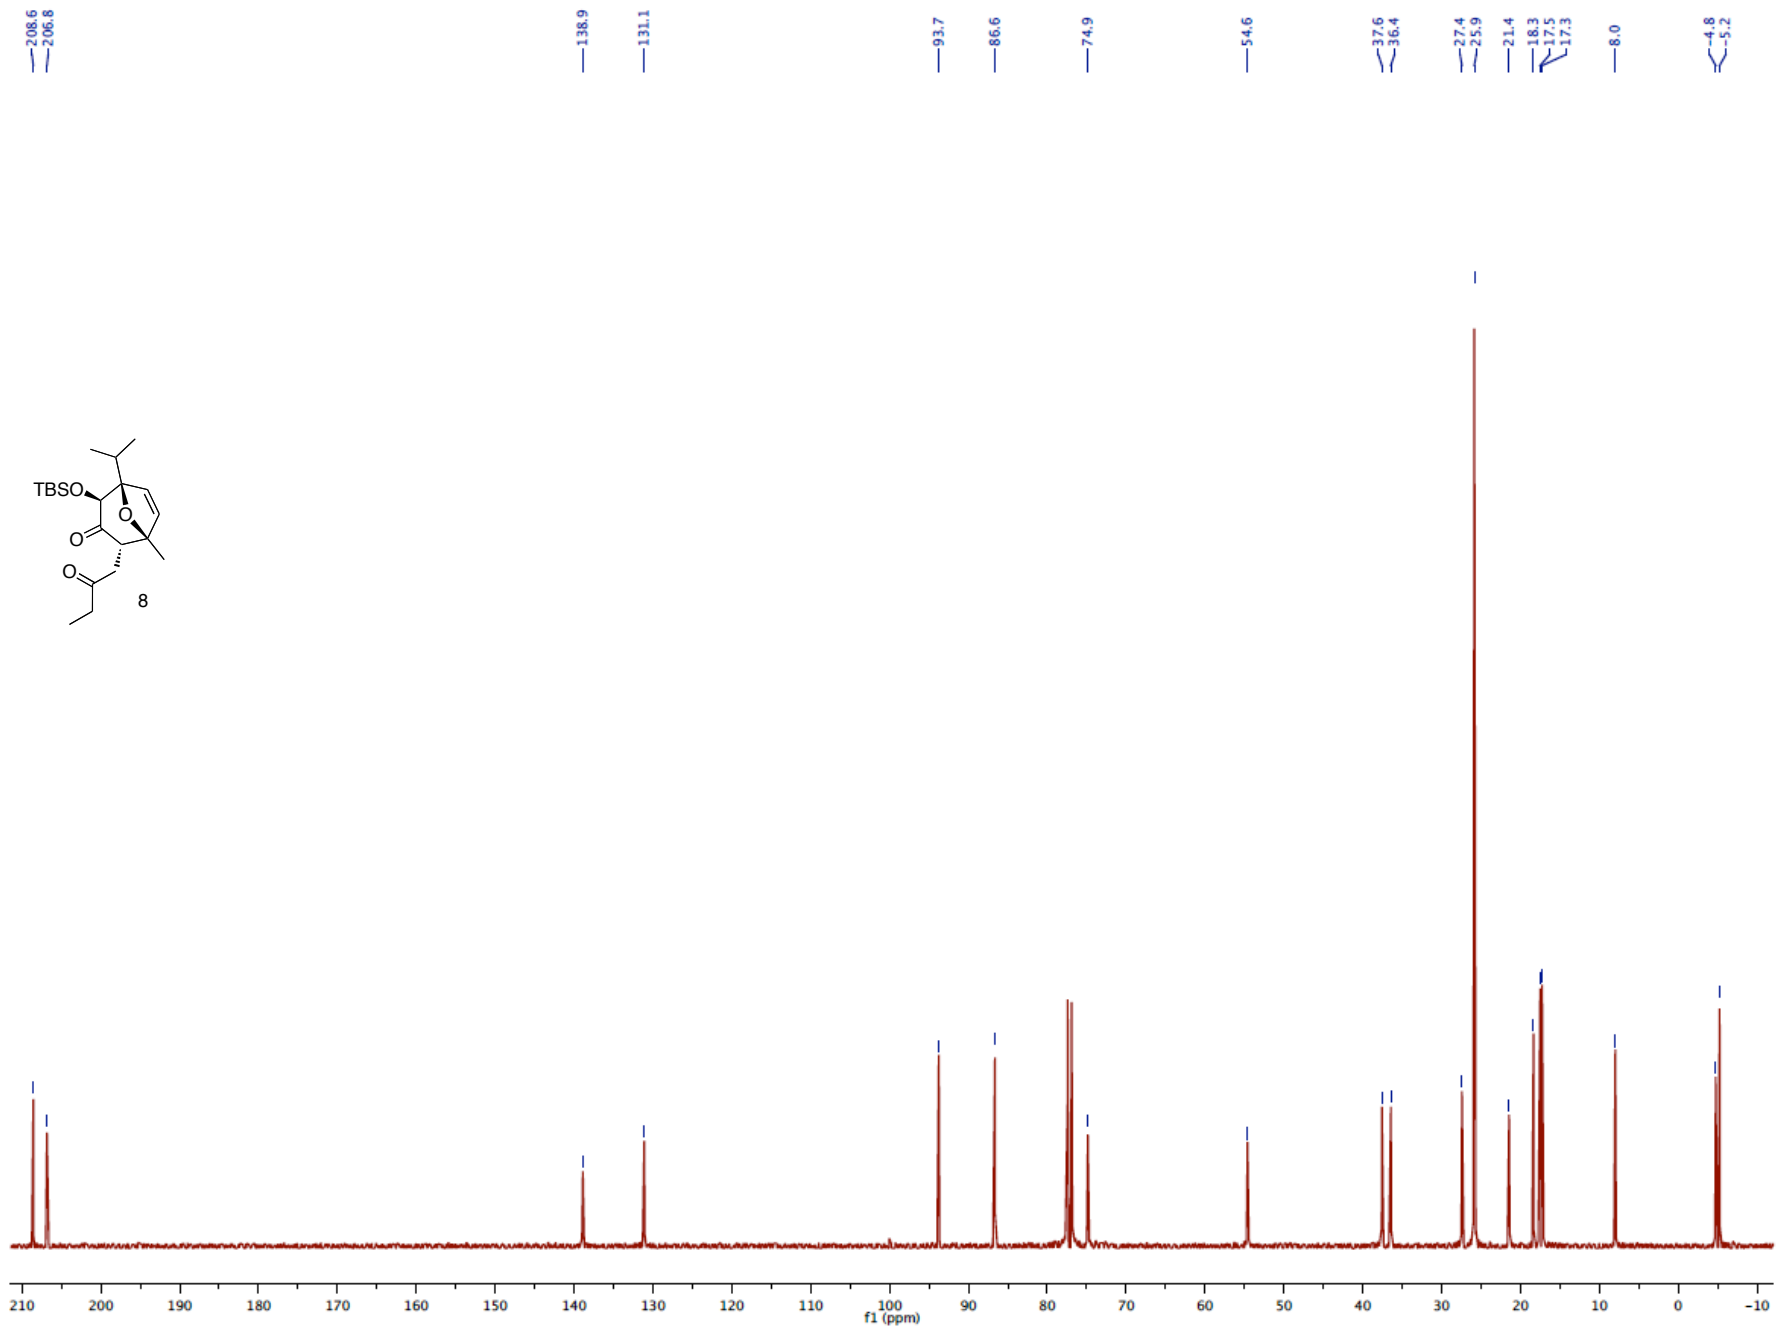

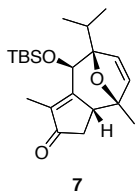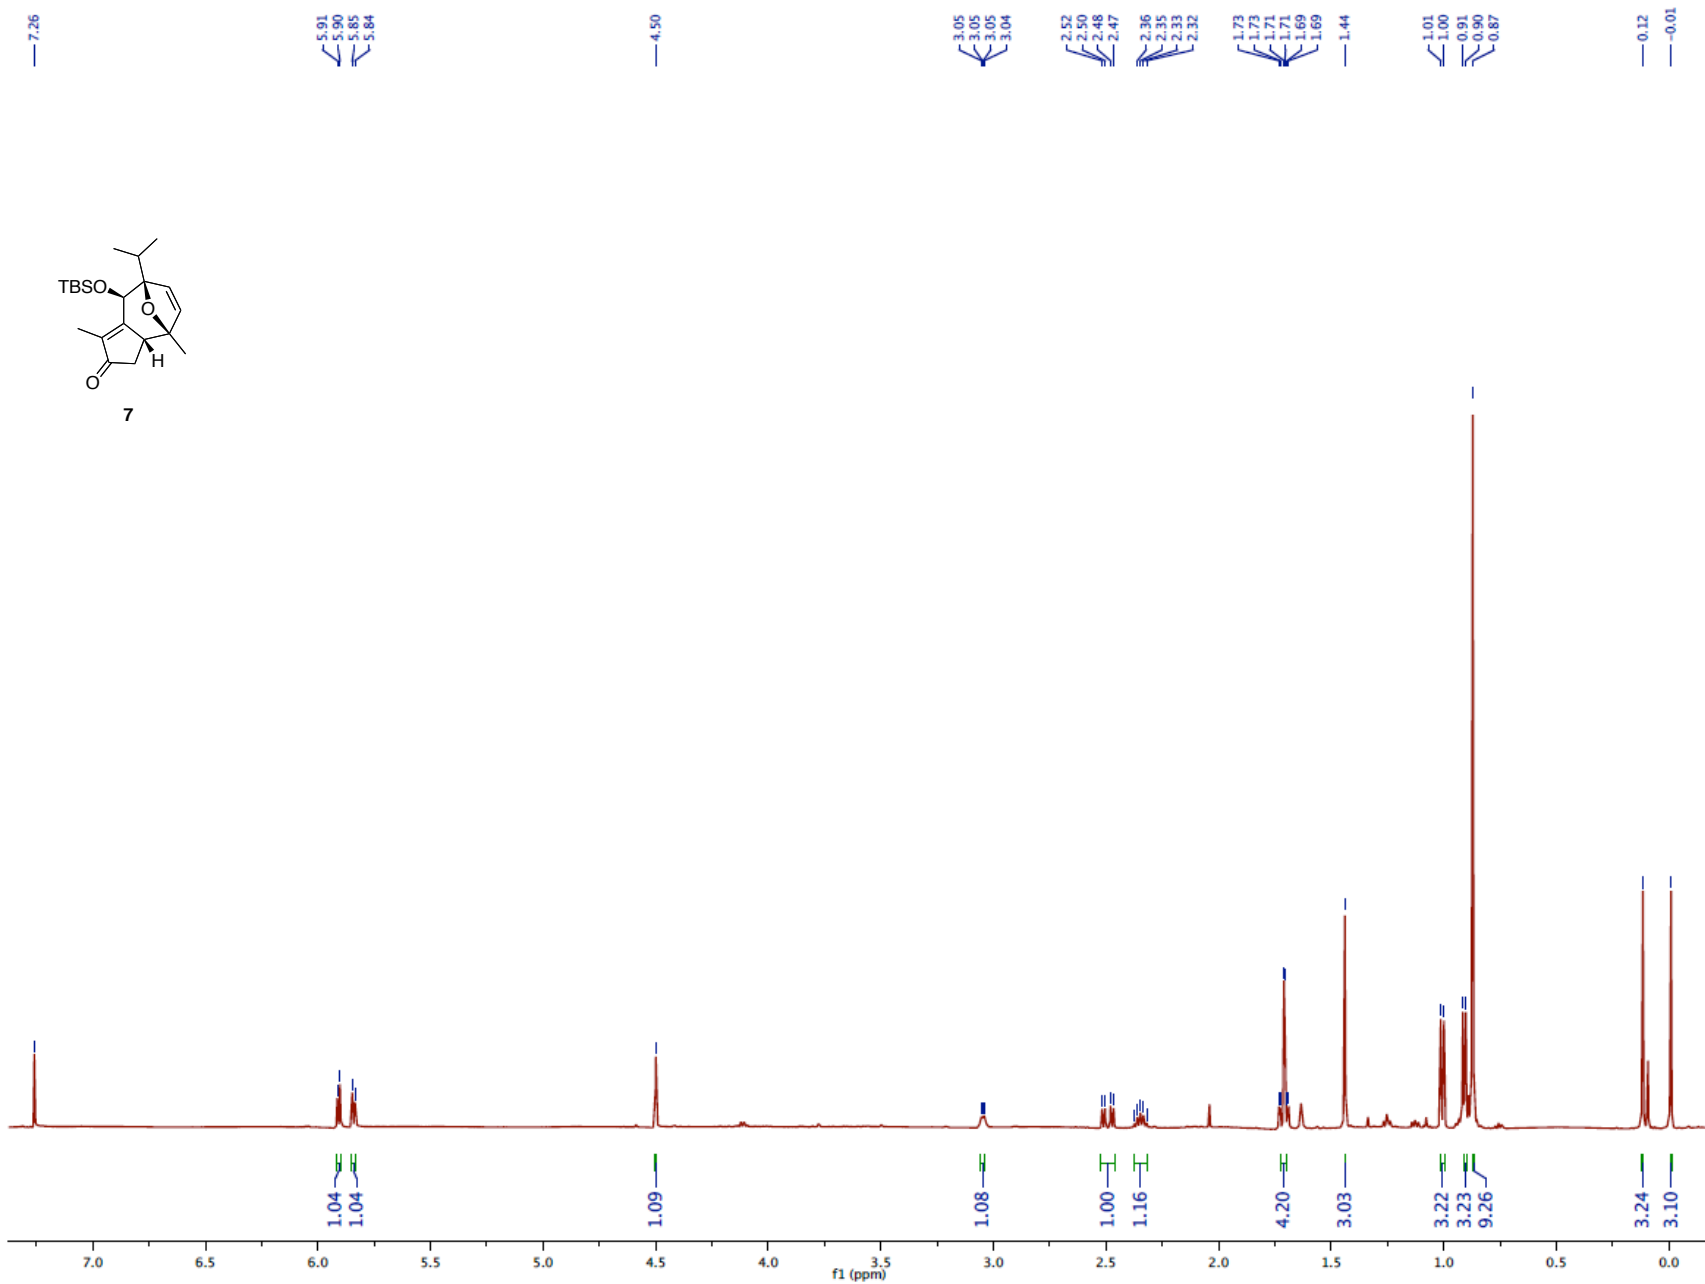

S#496701  
single pulse decoupled gated NOE

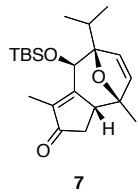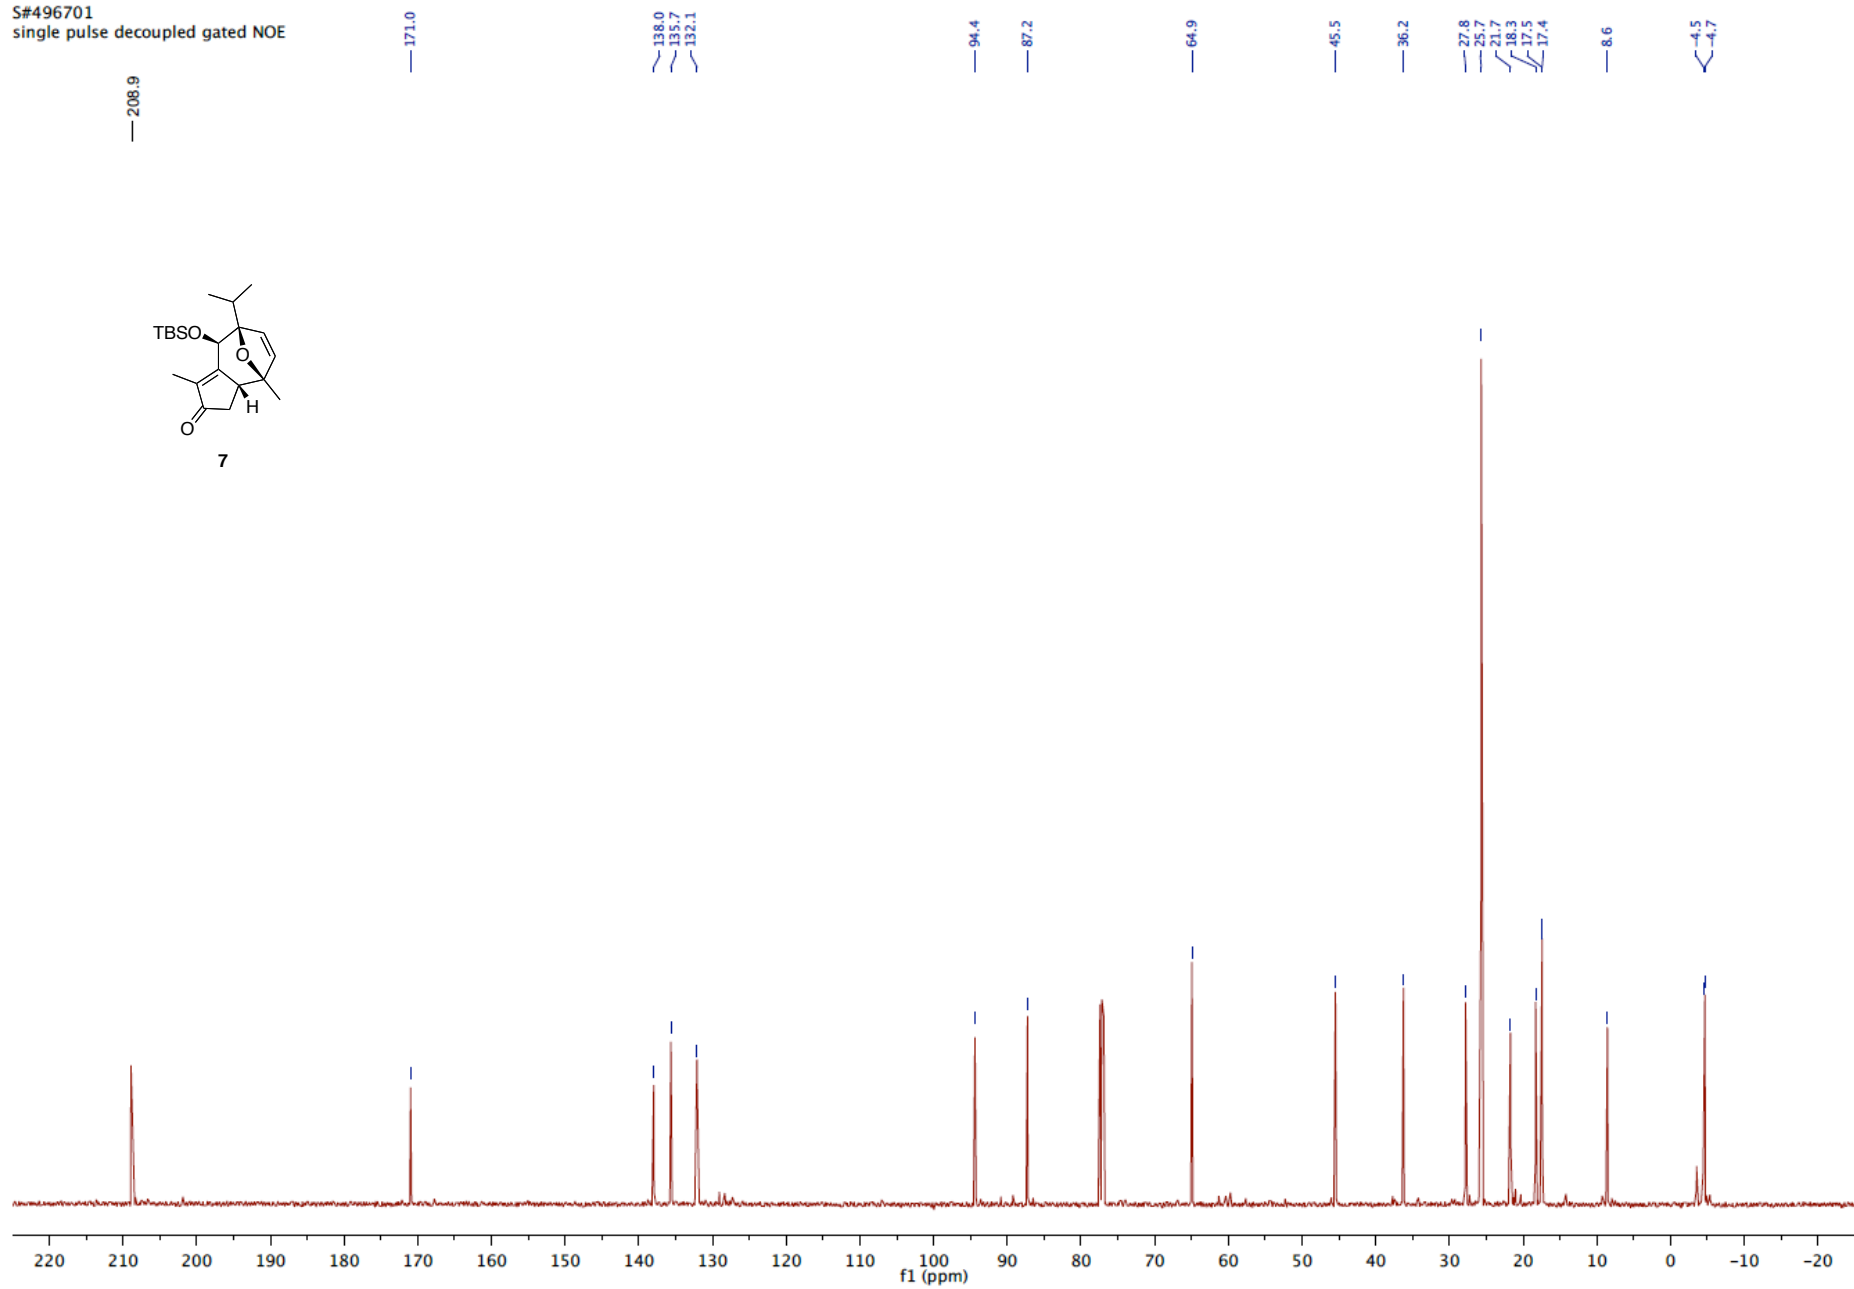

7.32  
7.32  
7.31  
7.31  
7.31  
7.30  
7.29  
7.29  
7.28

5.91  
5.90  
5.88  
5.87

4.54  
4.48  
4.45  
4.41  
4.40  
4.38  
4.25

2.75  
2.74  
2.72  
2.37  
2.34  
2.33  
2.29  
2.28  
2.27  
2.25  
2.24

1.73  
1.72

1.36

0.98  
0.97  
0.89  
0.87  
0.86

0.06  
-0.02

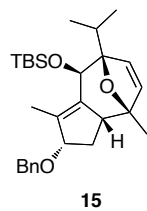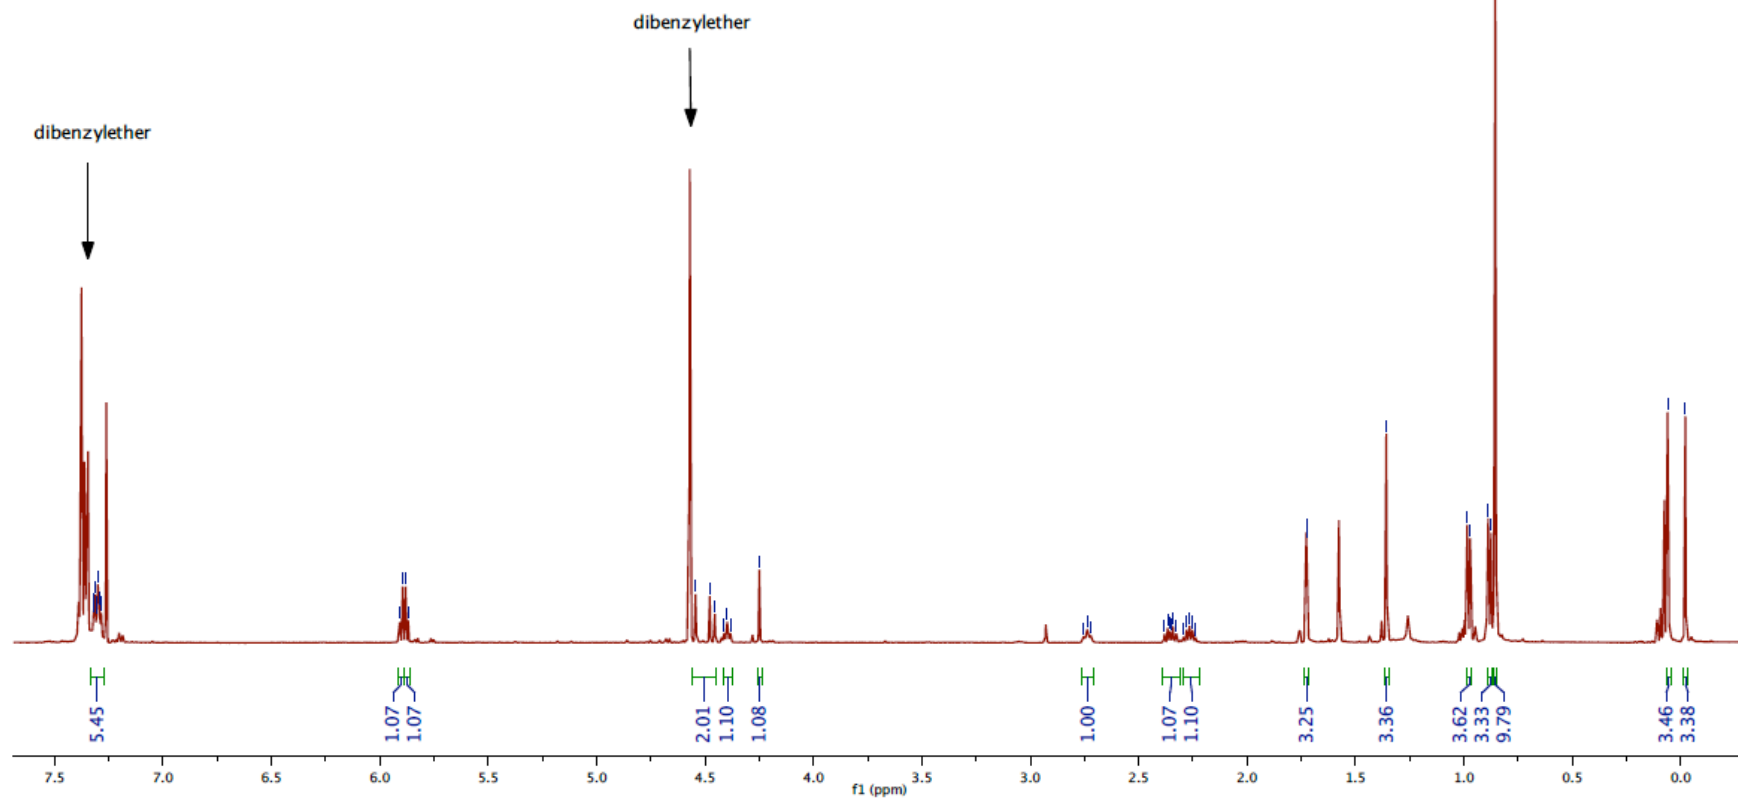

138.8  
138.4  
138.3  
137.2  
136.7  
—131.6  
—127.6

—94.2

87.3  
86.2

—71.2

—64.2

—49.0

—32.4

—28.2

—25.9

—21.4

18.4  
17.6  
17.5

—11.7

—1.1

—4.3  
—4.4

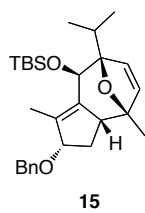

dibenzylether

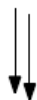

dibenzylether

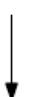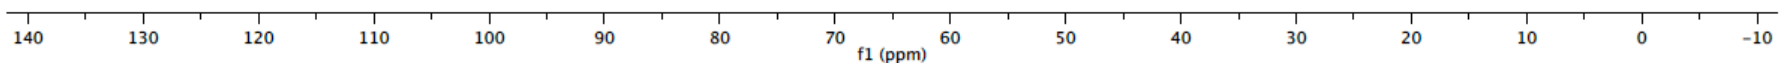



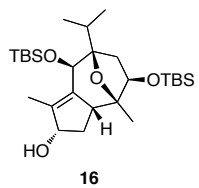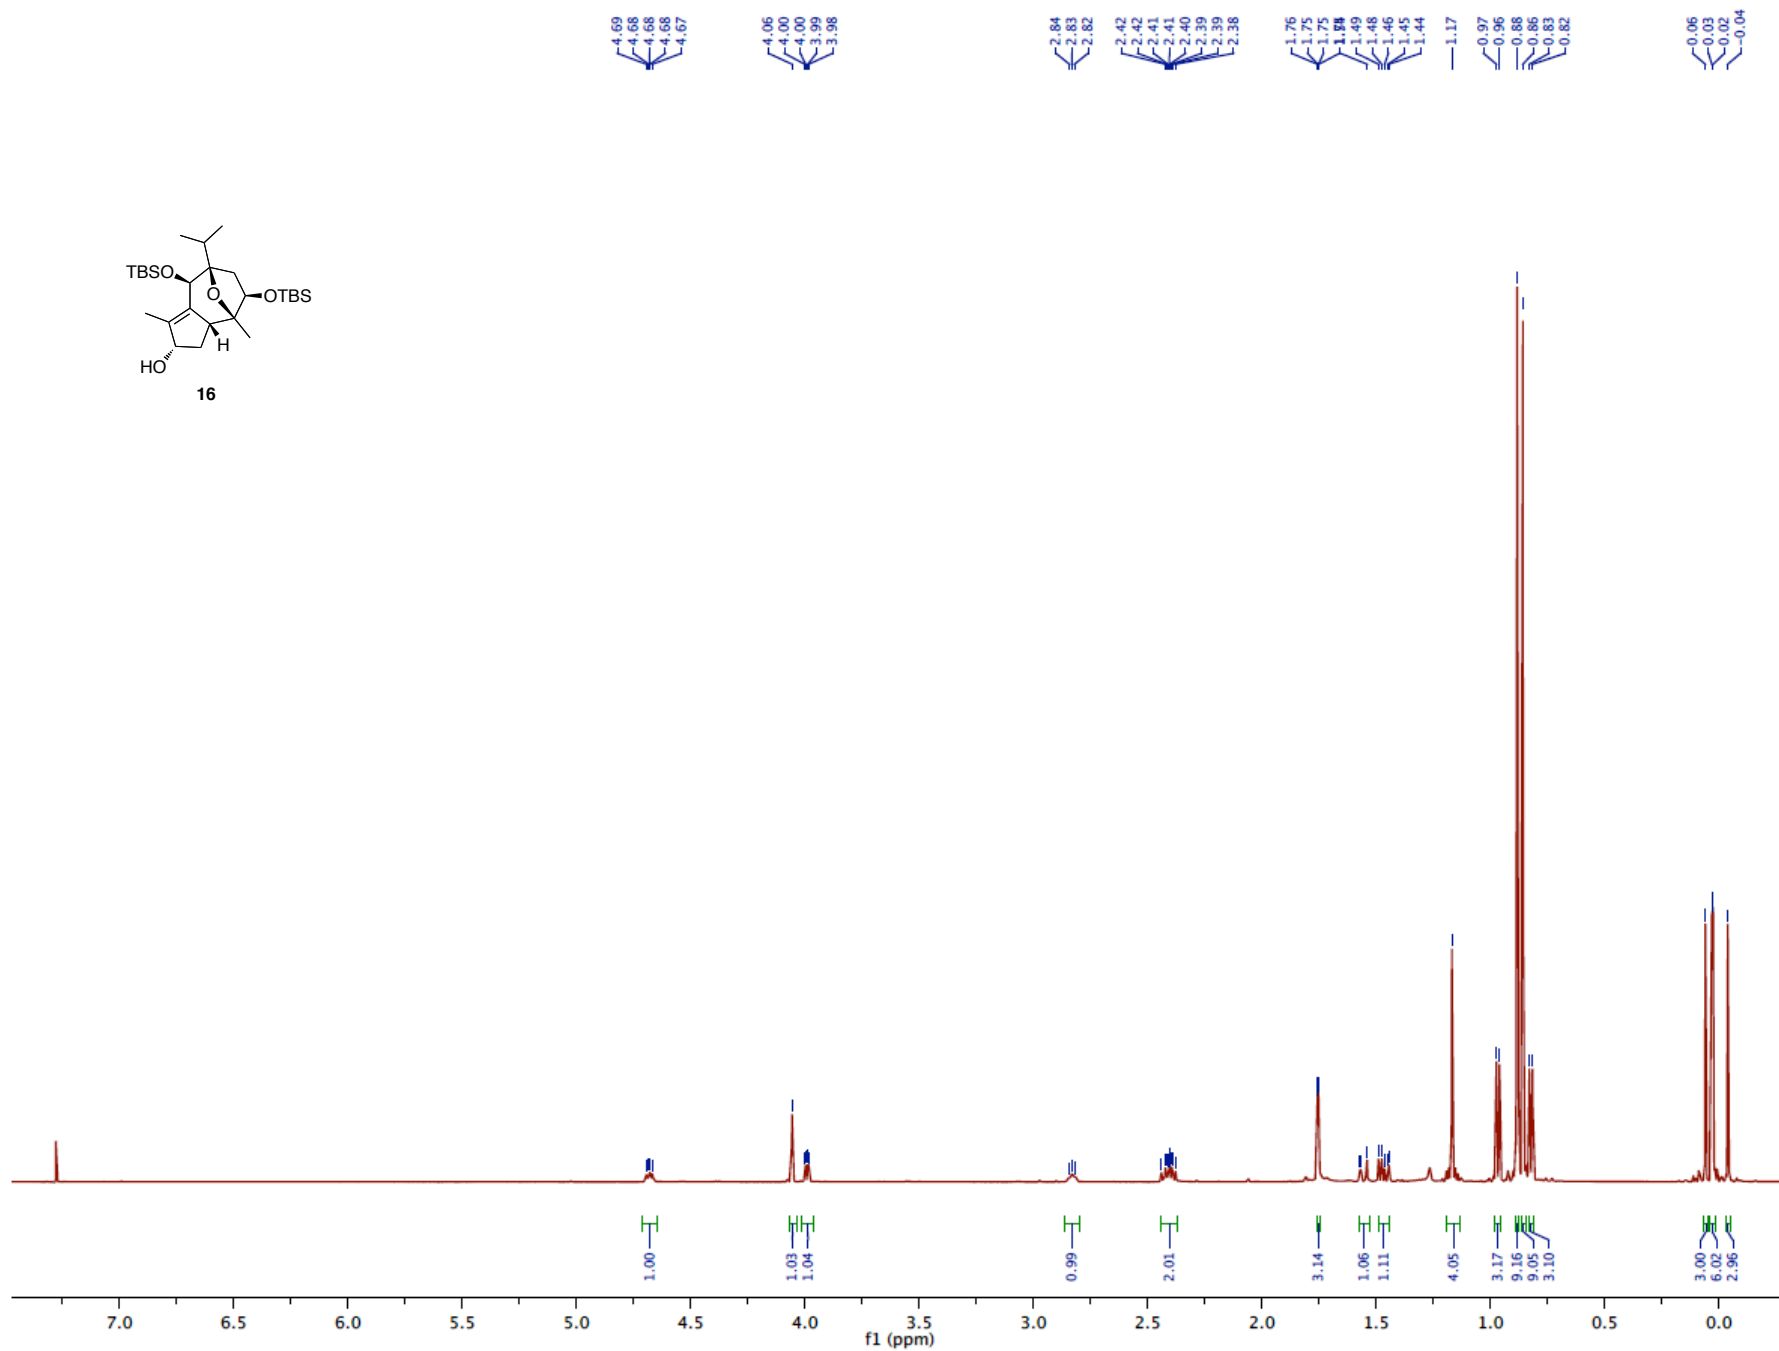

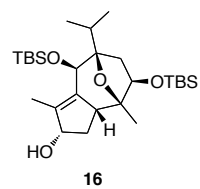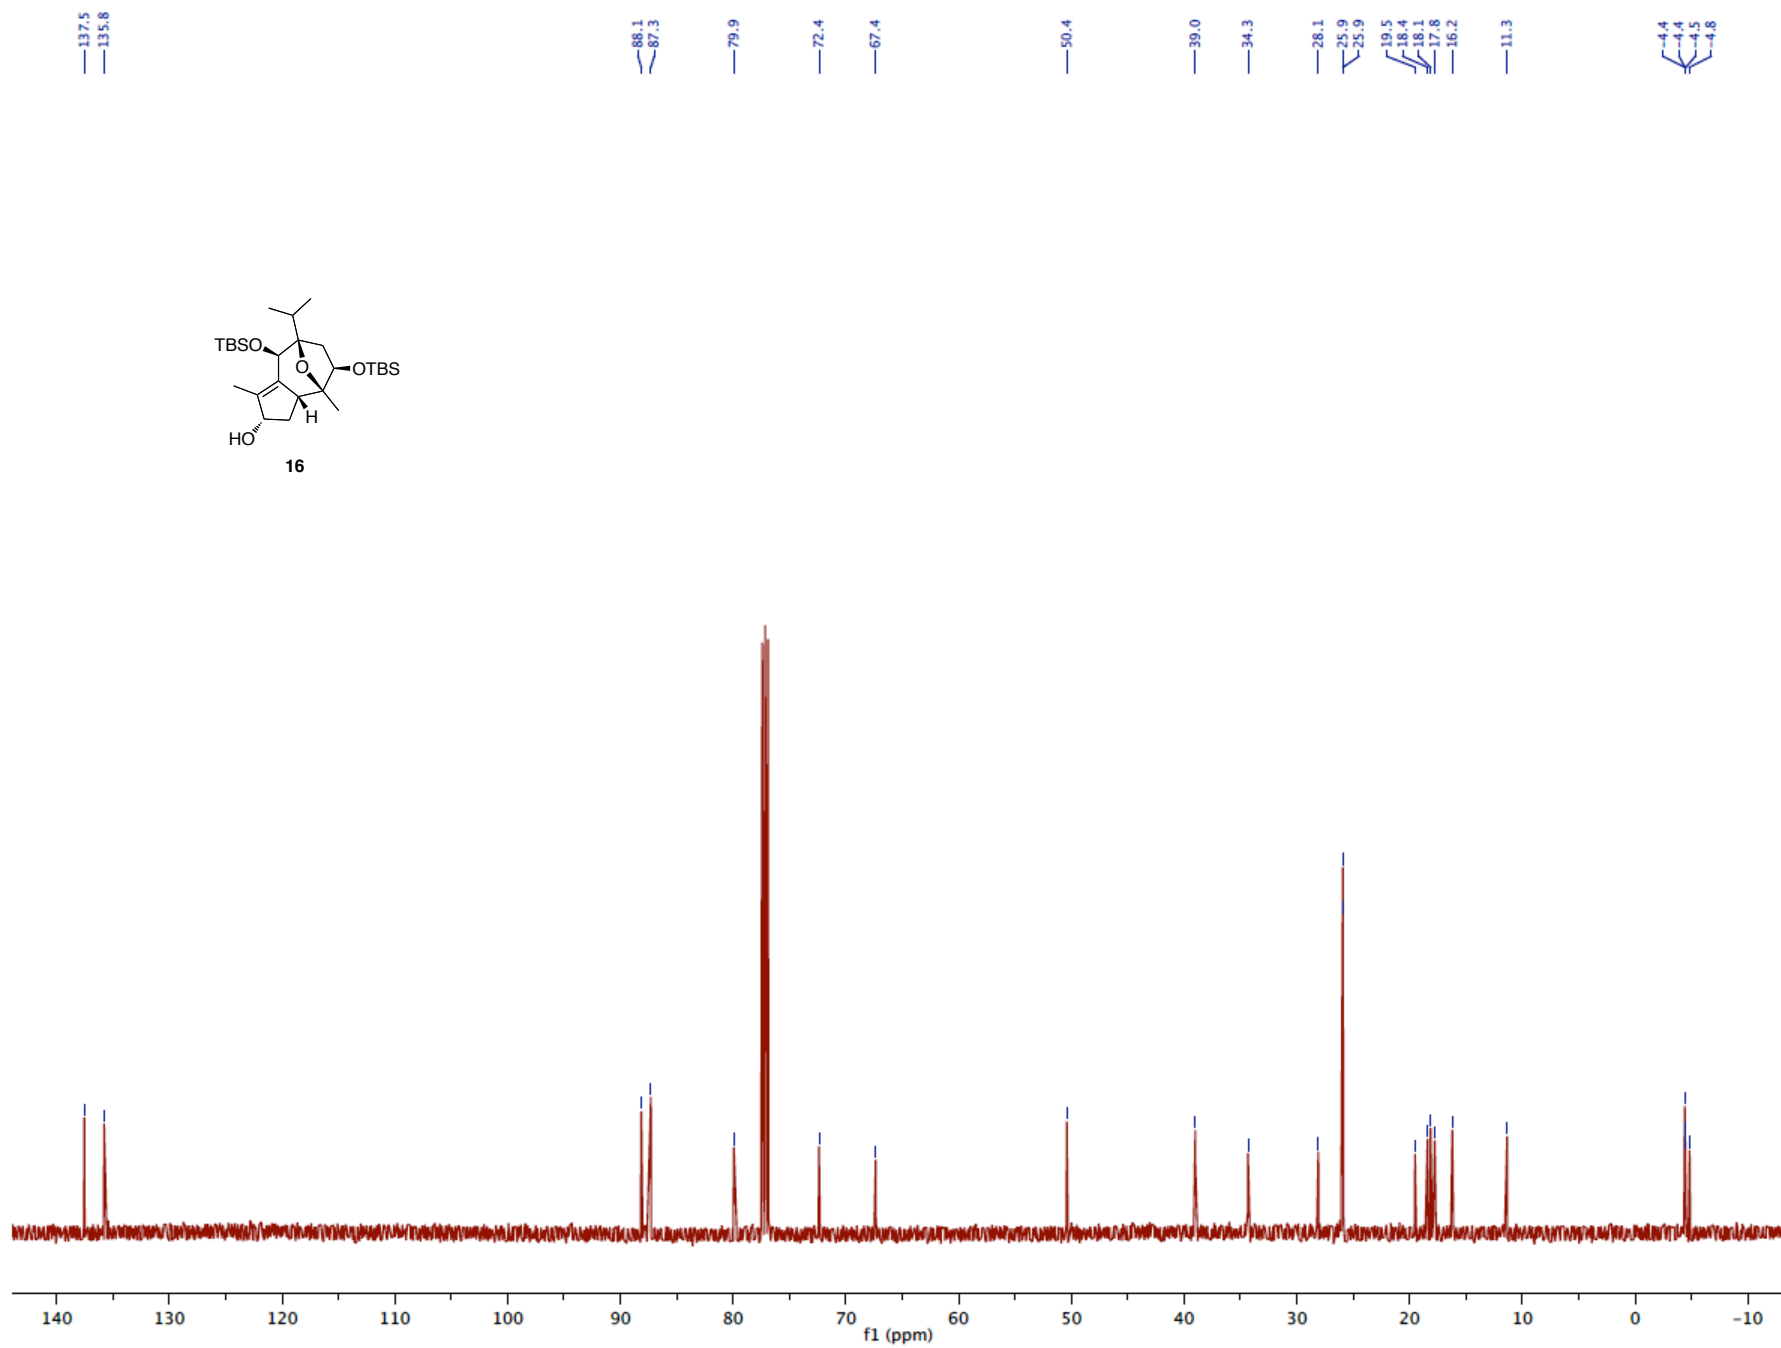

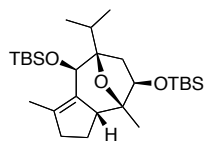

18

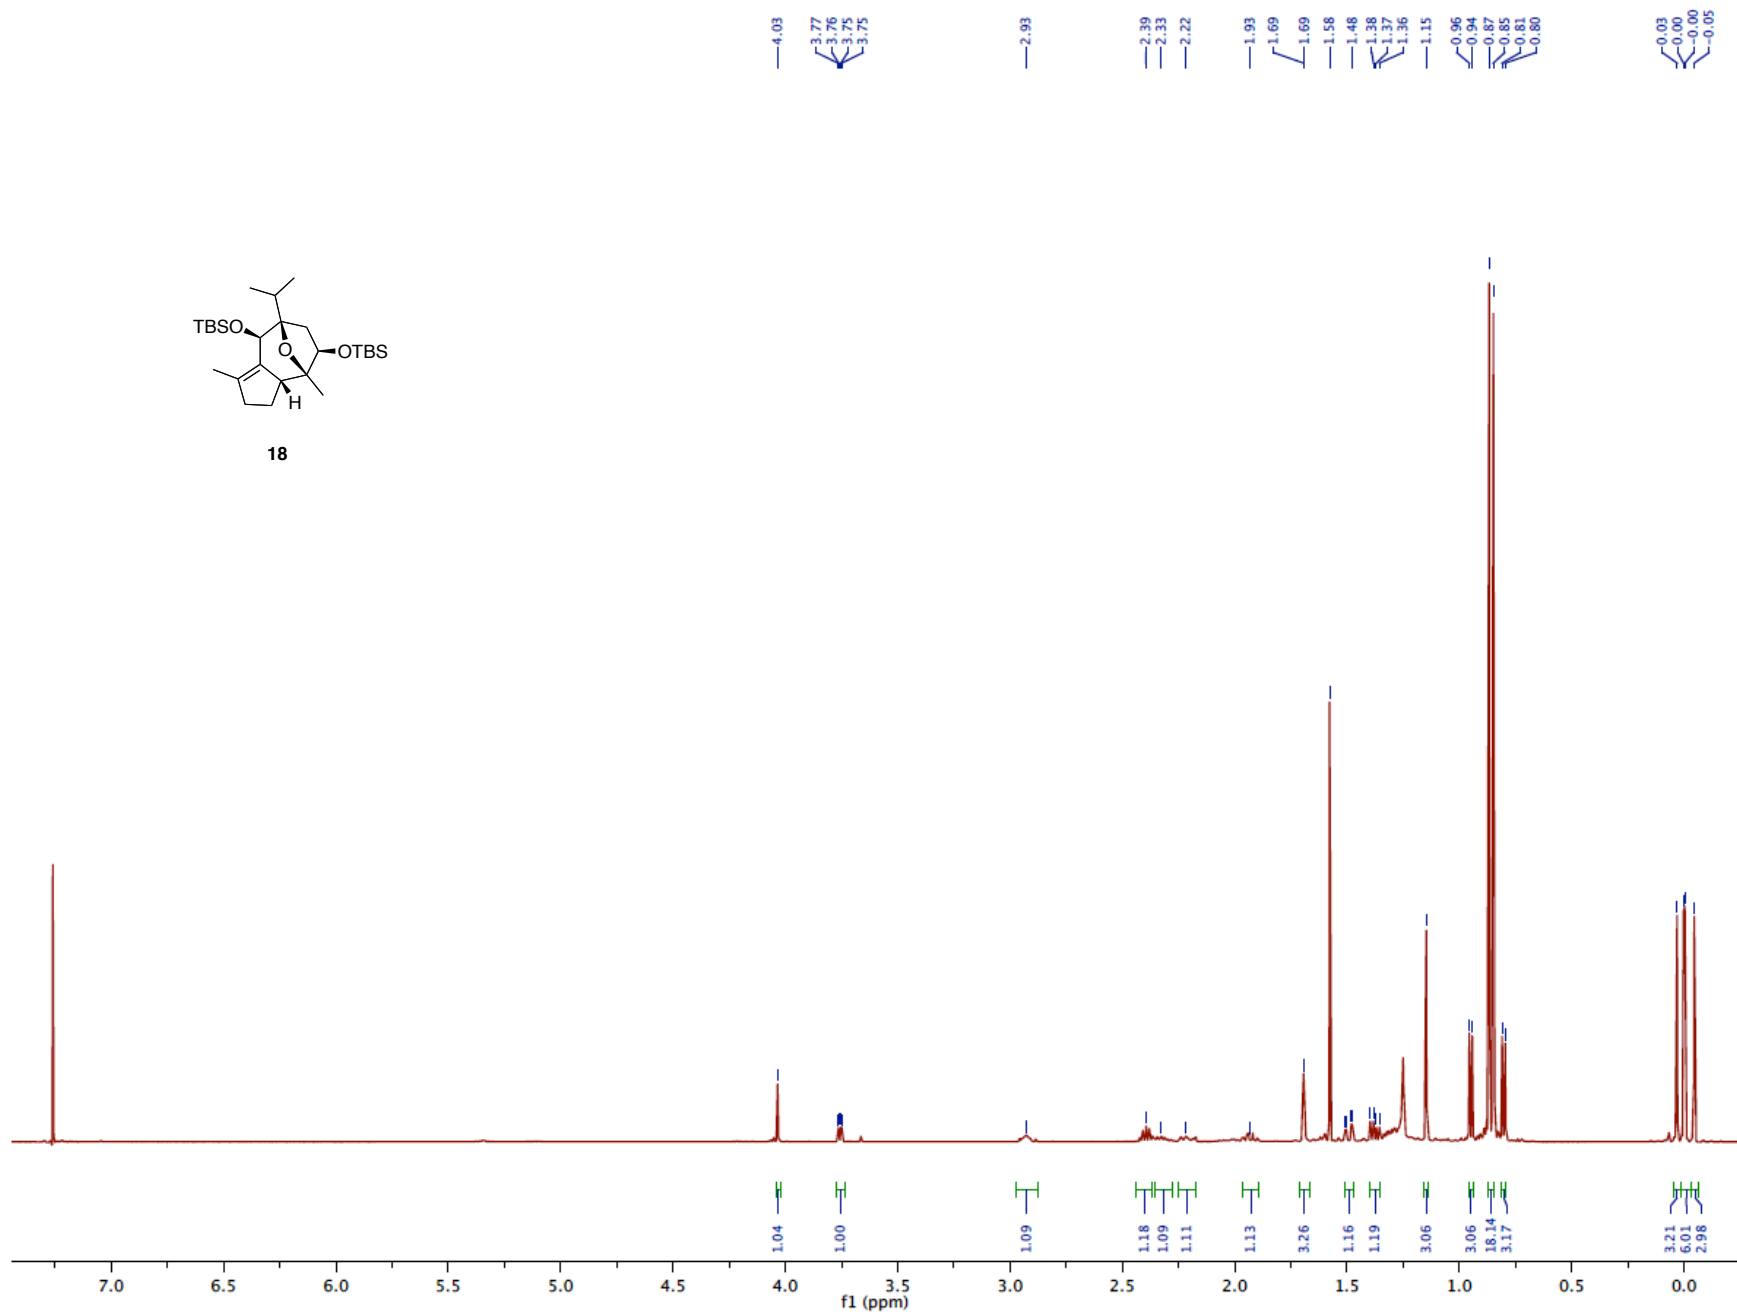

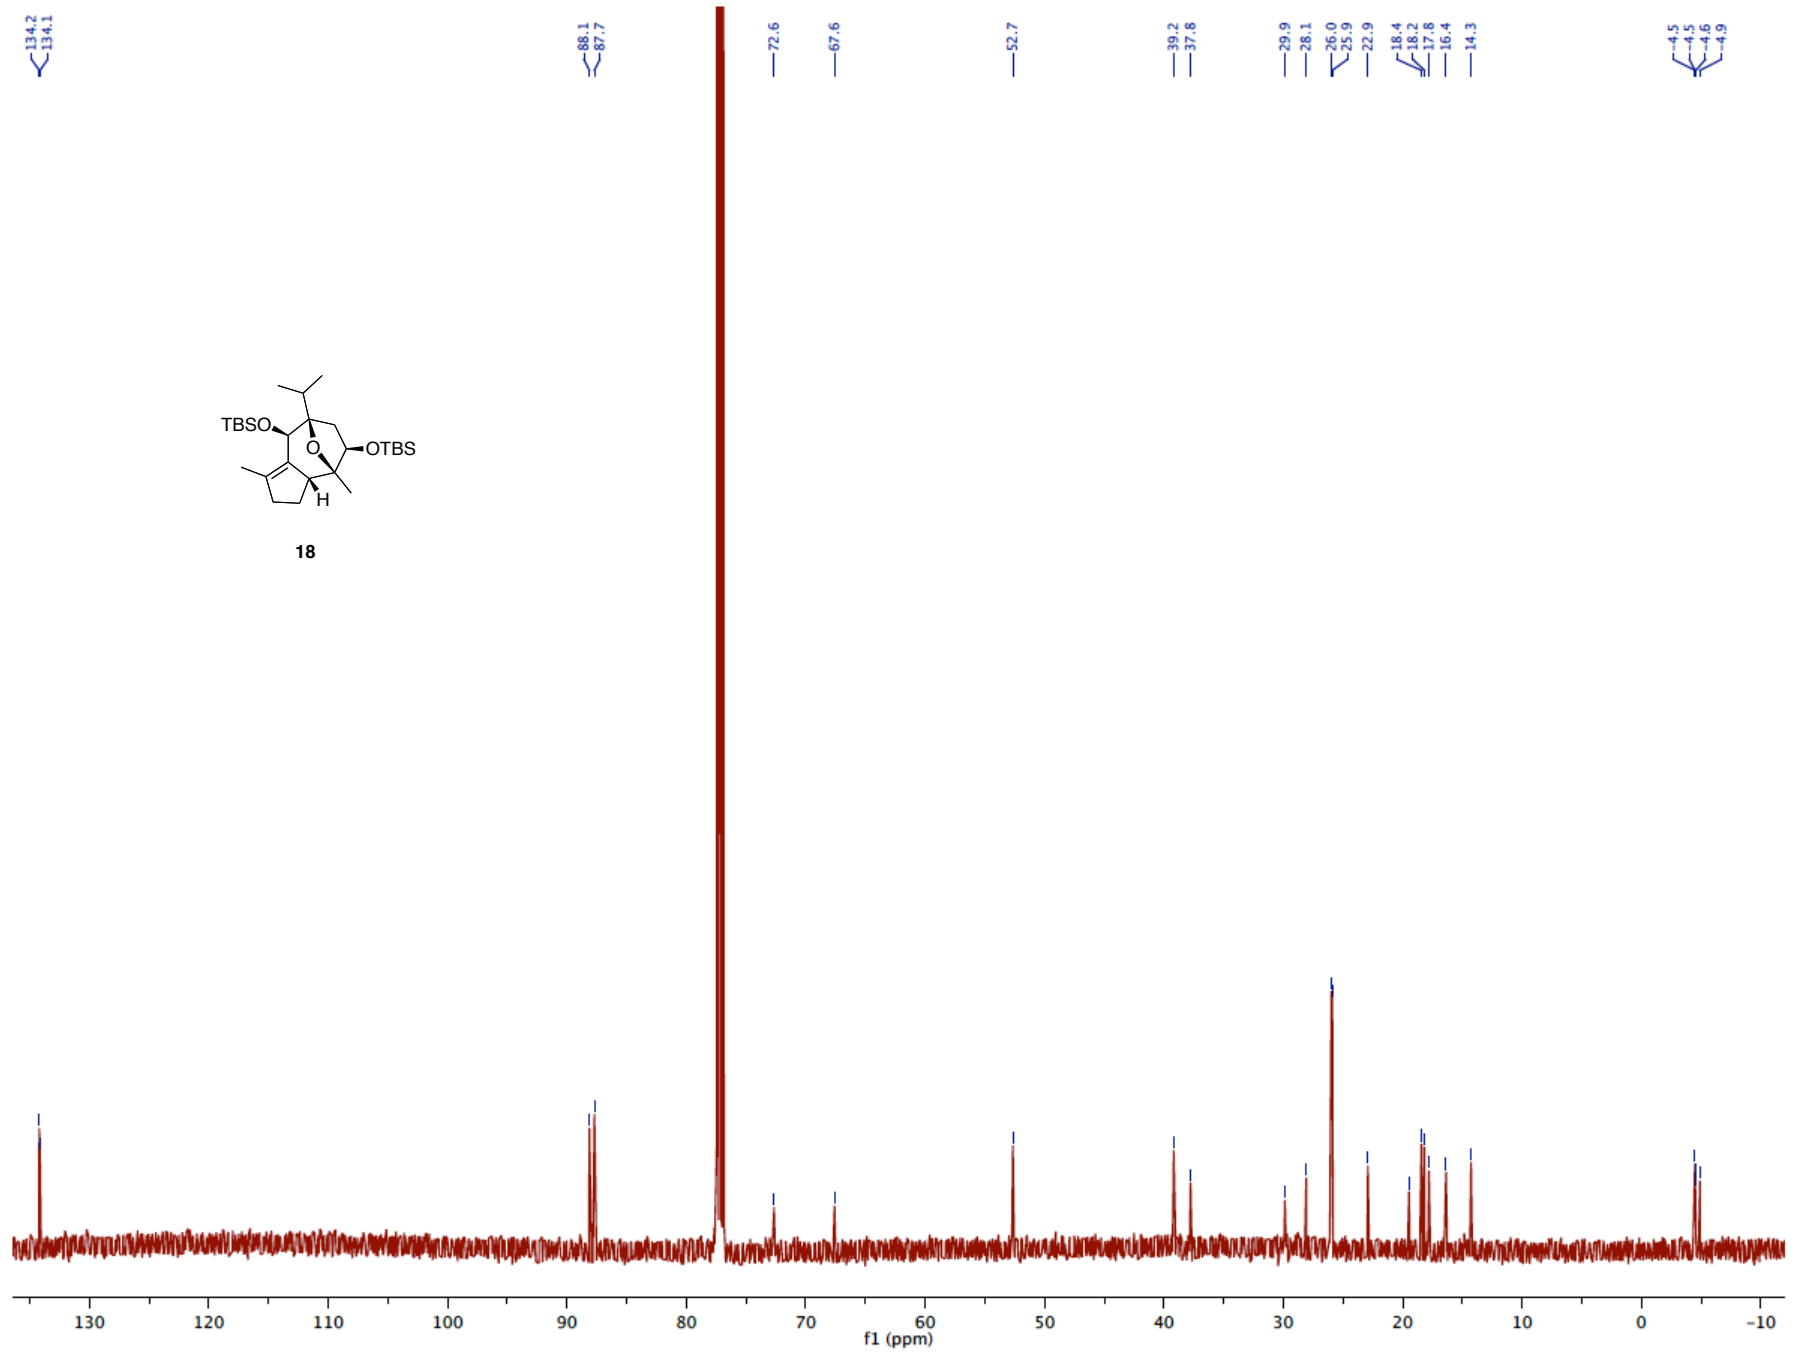

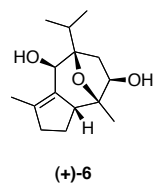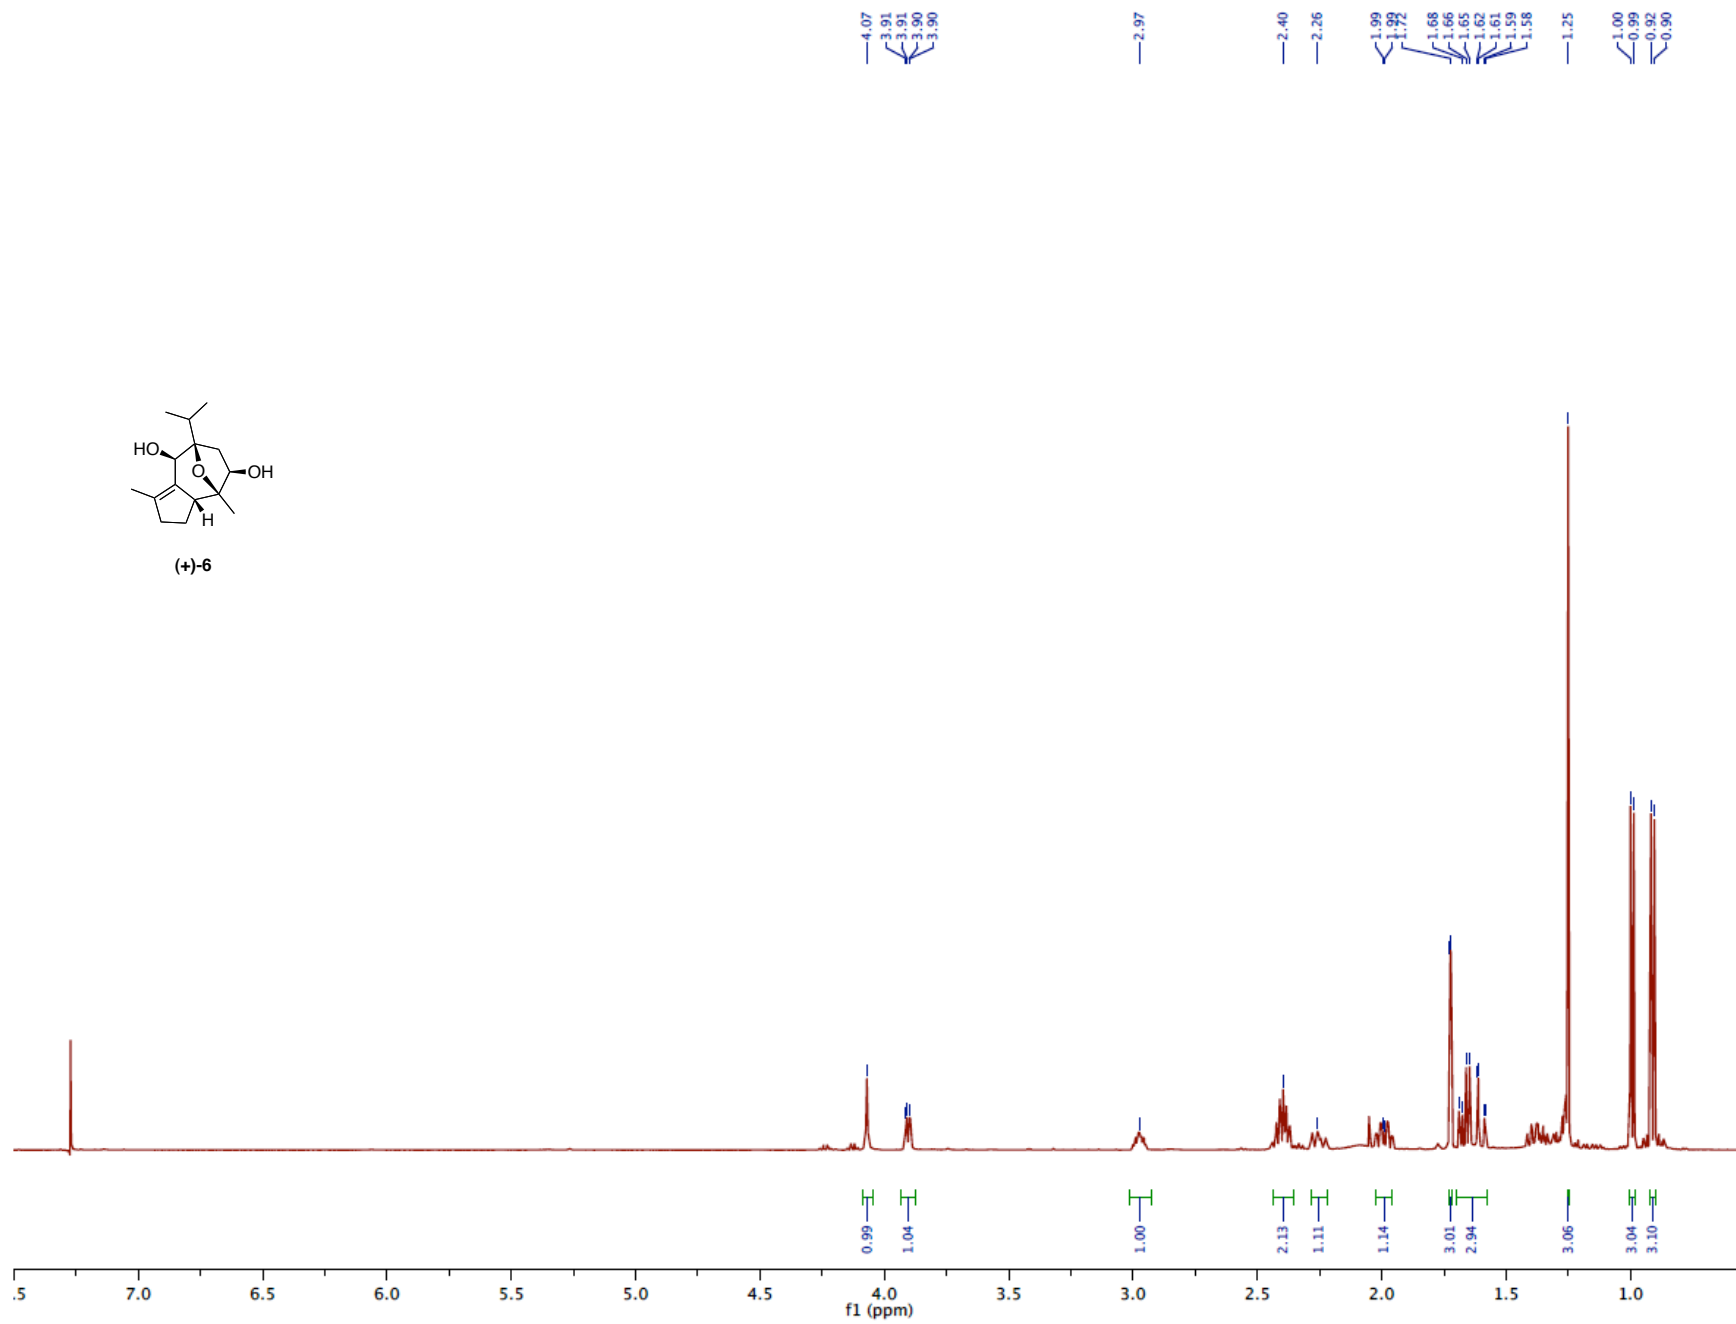

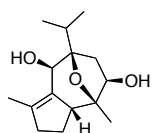

(+)-6

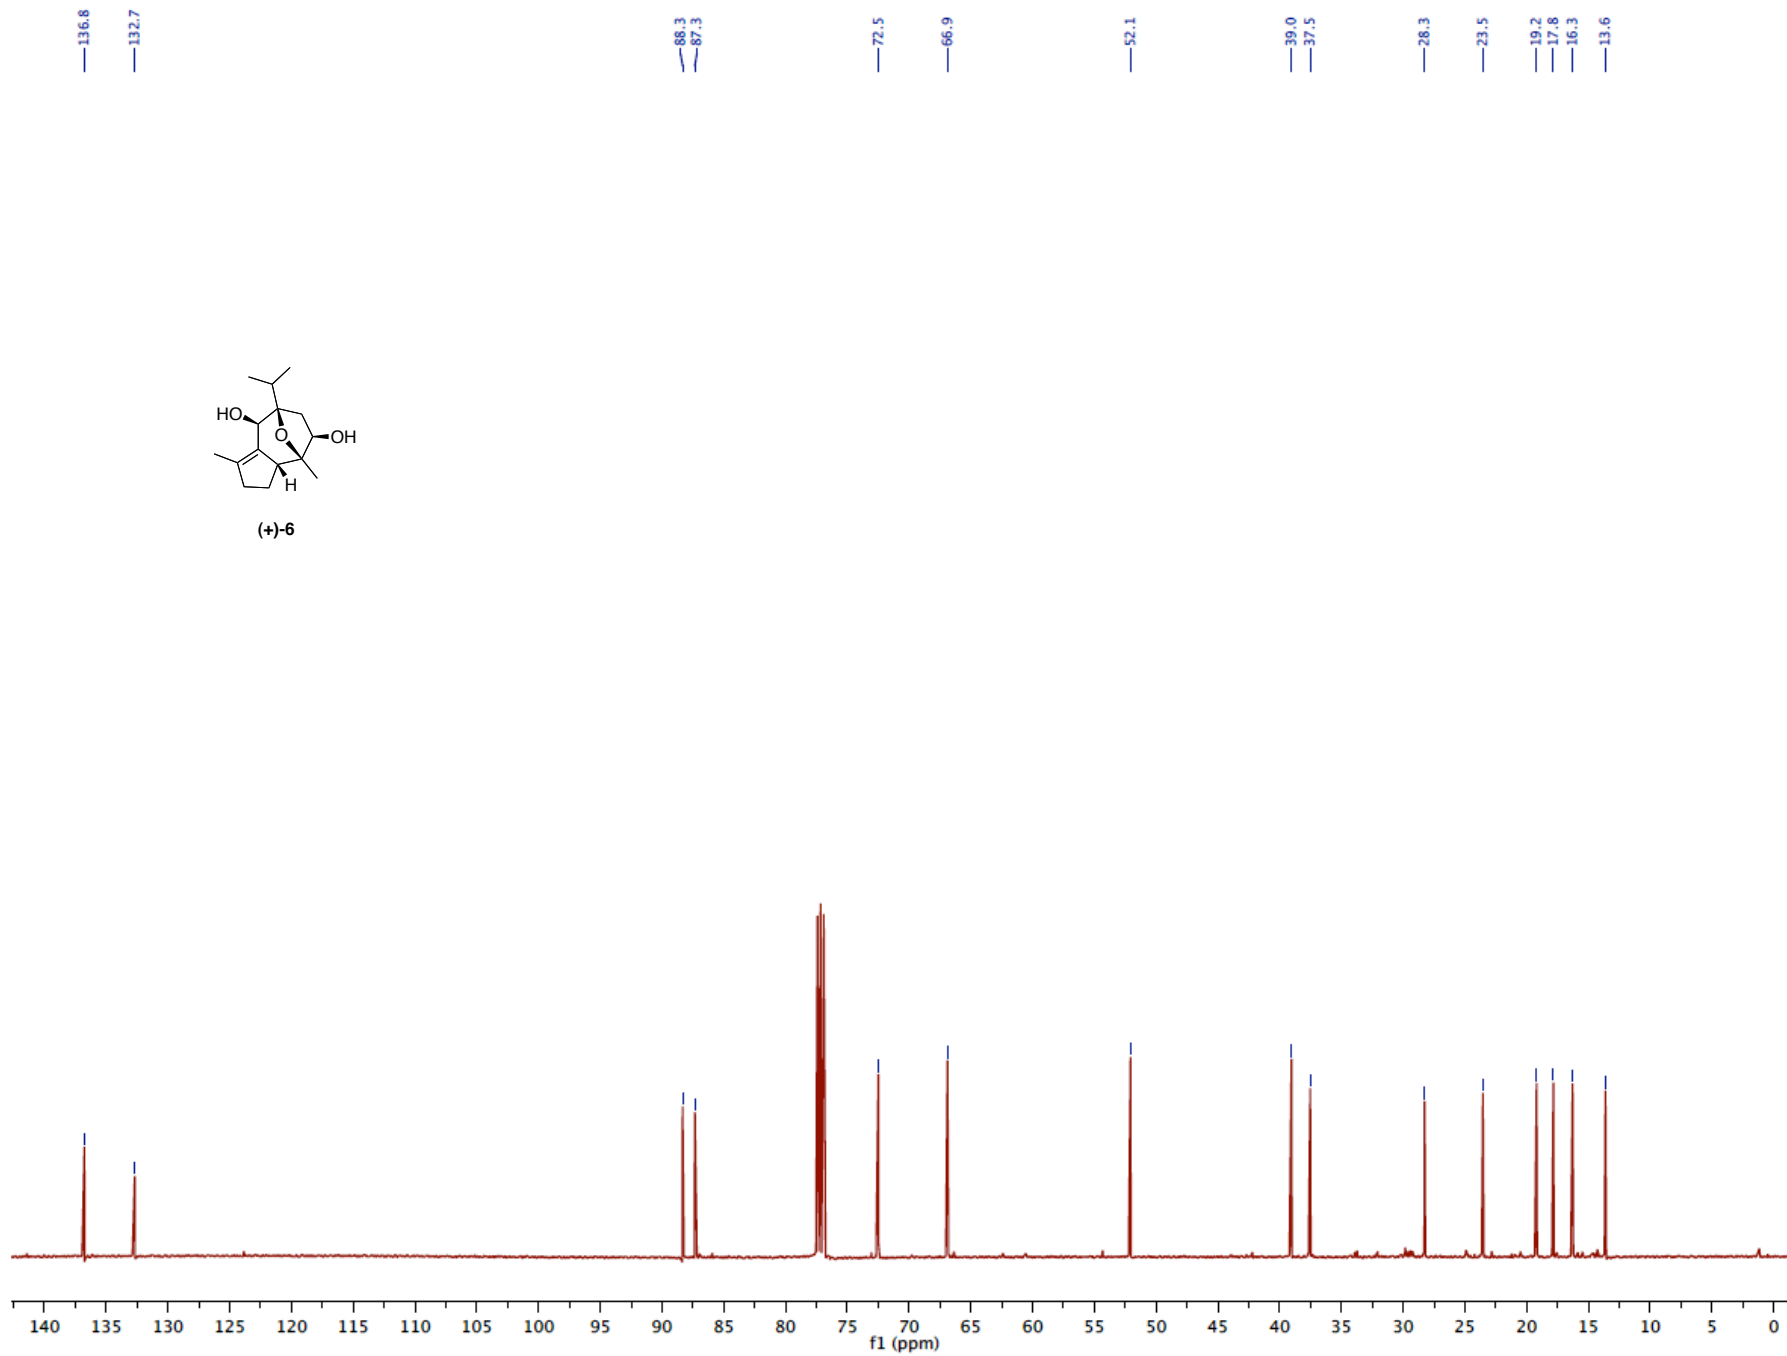

Table 1. Crystal data and structure refinement for Compound **13**.

|                                 |                                                |         |
|---------------------------------|------------------------------------------------|---------|
| Identification code             | Compound <b>13</b>                             |         |
| Empirical formula               | C <sub>12</sub> H <sub>16</sub> O <sub>3</sub> |         |
| Formula weight                  | 208.25                                         |         |
| Temperature                     | 100(2) K                                       |         |
| Wavelength                      | 1.54178 Å                                      |         |
| Crystal system                  | Orthorhombic                                   |         |
| Space group                     | P2(1)2(1)2(1)                                  |         |
| Unit cell dimensions            | a = 6.8430(5) Å                                | α = 90° |
|                                 | b = 10.1285(7) Å                               | β = 90° |
|                                 | c = 17.0834(12) Å                              | γ = 90° |
| Volume                          | 1184.04(15) Å <sup>3</sup>                     |         |
| Z                               | 4                                              |         |
| Density (calculated)            | 1.168 g/cm <sup>3</sup>                        |         |
| Absorption coefficient          | 0.676 mm <sup>-1</sup>                         |         |
| F(000)                          | 448                                            |         |
| Crystal size                    | 0.33 x 0.22 x 0.11 mm <sup>3</sup>             |         |
| Theta range for data collection | 5.08 to 62.57°                                 |         |
| Index ranges                    | -7 ≤ h ≤ 7, -11 ≤ k ≤ 11, -19 ≤ l ≤ 18         |         |
| Reflections collected           | 3417                                           |         |
| Independent reflections         | 1500 [R(int) = 0.0364]                         |         |
| Completeness to theta = 55.00°  | 95.1 %                                         |         |
| Absorption correction           | Multi-scan                                     |         |
| Refinement method               | Full-matrix least-squares on F <sup>2</sup>    |         |

|                                   |                                    |
|-----------------------------------|------------------------------------|
| Data / restraints / parameters    | 1500 / 0 / 136                     |
| Goodness-of-fit on F <sup>2</sup> | 1.055                              |
| Final R indices [I>2sigma(I)]     | R1 = 0.0393, wR2 = 0.0967          |
| R indices (all data)              | R1 = 0.0446, wR2 = 0.0993          |
| Absolute structure parameter      | 0.0(3)                             |
| Largest diff. peak and hole       | 0.130 and -0.183 e Å <sup>-3</sup> |



Table 2. Atomic coordinates ( $\times 10^4$ ) and equivalent isotropic displacement parameters ( $\text{\AA}^2 \times 10^3$ ) for Compound **13**.  $U(\text{eq})$  is defined as one third of the trace of the orthogonalized  $U^{ij}$  tensor.

|       | x       | y       | z        | $U(\text{eq})$ |
|-------|---------|---------|----------|----------------|
| O(1)  | 7673(2) | 4447(2) | 9449(1)  | 22(1)          |
| O(2)  | 5174(2) | 2432(2) | 9972(1)  | 26(1)          |
| O(3)  | 3774(3) | 2274(2) | 8288(1)  | 38(1)          |
| C(1)  | 4514(3) | 3447(2) | 9461(1)  | 21(1)          |
| C(2)  | 5664(4) | 4716(2) | 9649(1)  | 21(1)          |
| C(3)  | 5117(4) | 5748(2) | 9043(1)  | 26(1)          |
| C(4)  | 6328(4) | 5655(2) | 8446(1)  | 26(1)          |
| C(5)  | 7772(4) | 4559(2) | 8606(1)  | 23(1)          |
| C(6)  | 6920(4) | 3274(2) | 8288(1)  | 23(1)          |
| C(7)  | 4958(4) | 2961(2) | 8630(1)  | 24(1)          |
| C(8)  | 5562(4) | 5116(2) | 10508(1) | 29(1)          |
| C(9)  | 6812(5) | 6338(3) | 10659(2) | 46(1)          |
| C(10) | 3455(5) | 5354(3) | 10771(2) | 36(1)          |
| C(11) | 9864(4) | 4832(3) | 8369(2)  | 33(1)          |
| C(12) | 7758(4) | 2465(3) | 7790(2)  | 34(1)          |

Table 3. Bond lengths [ $\text{\AA}$ ] and angles [ $^\circ$ ] for Compound **13**.

---

|                |            |
|----------------|------------|
| O(1)-C(5)      | 1.446(3)   |
| O(1)-C(2)      | 1.442(3)   |
| O(2)-C(1)      | 1.423(3)   |
| O(3)-C(7)      | 1.217(3)   |
| C(1)-C(7)      | 1.533(3)   |
| C(1)-C(2)      | 1.540(3)   |
| C(2)-C(8)      | 1.524(3)   |
| C(2)-C(3)      | 1.518(3)   |
| C(3)-C(4)      | 1.318(4)   |
| C(4)-C(5)      | 1.511(3)   |
| C(5)-C(11)     | 1.514(4)   |
| C(5)-C(6)      | 1.526(3)   |
| C(6)-C(12)     | 1.314(4)   |
| C(6)-C(7)      | 1.498(4)   |
| C(8)-C(10)     | 1.529(4)   |
| C(8)-C(9)      | 1.527(4)   |
|                |            |
| C(5)-O(1)-C(2) | 105.34(17) |
| O(2)-C(1)-C(7) | 105.86(17) |
| O(2)-C(1)-C(2) | 108.21(17) |
| C(7)-C(1)-C(2) | 111.07(19) |
| O(1)-C(2)-C(8) | 108.72(19) |

|                 |            |
|-----------------|------------|
| O(1)-C(2)-C(3)  | 101.78(18) |
| C(8)-C(2)-C(3)  | 117.53(19) |
| O(1)-C(2)-C(1)  | 106.28(17) |
| C(8)-C(2)-C(1)  | 113.51(19) |
| C(3)-C(2)-C(1)  | 107.84(18) |
| C(4)-C(3)-C(2)  | 108.9(2)   |
| C(3)-C(4)-C(5)  | 108.8(2)   |
| O(1)-C(5)-C(4)  | 102.02(18) |
| O(1)-C(5)-C(11) | 109.0(2)   |
| C(4)-C(5)-C(11) | 115.8(2)   |
| O(1)-C(5)-C(6)  | 105.65(18) |
| C(4)-C(5)-C(6)  | 108.2(2)   |
| C(11)-C(5)-C(6) | 114.9(2)   |
| C(12)-C(6)-C(7) | 120.8(2)   |
| C(12)-C(6)-C(5) | 126.6(2)   |
| C(7)-C(6)-C(5)  | 112.6(2)   |
| O(3)-C(7)-C(6)  | 122.1(2)   |
| O(3)-C(7)-C(1)  | 119.7(2)   |
| C(6)-C(7)-C(1)  | 118.1(2)   |
| C(2)-C(8)-C(10) | 111.6(2)   |
| C(2)-C(8)-C(9)  | 110.6(2)   |
| C(10)-C(8)-C(9) | 110.5(2)   |

---

Table 4. Anisotropic displacement parameters ( $\text{\AA}^2 \times 10^3$ ) for Compound **13**. The anisotropic displacement factor exponent takes the form:  $-2 \pi^2 [h^2 a^{*2} U^{11} + \dots + 2 h k a^* b^* U^{12}]$

|       | U <sup>11</sup> | U <sup>22</sup> | U <sup>33</sup> | U <sup>23</sup> | U <sup>13</sup> | U <sup>12</sup> |
|-------|-----------------|-----------------|-----------------|-----------------|-----------------|-----------------|
| O(1)  | 24(1)           | 18(1)           | 25(1)           | 4(1)            | -3(1)           | -1(1)           |
| O(2)  | 26(1)           | 17(1)           | 34(1)           | 8(1)            | -2(1)           | -3(1)           |
| O(3)  | 31(1)           | 41(1)           | 41(1)           | -16(1)          | 3(1)            | -10(1)          |
| C(1)  | 22(1)           | 16(1)           | 24(1)           | 2(1)            | -1(1)           | -1(1)           |
| C(2)  | 24(1)           | 13(1)           | 27(1)           | 1(1)            | 0(1)            | -2(1)           |
| C(3)  | 28(1)           | 16(1)           | 33(1)           | 2(1)            | -3(1)           | 2(1)            |
| C(4)  | 30(1)           | 16(1)           | 32(1)           | 9(1)            | -4(1)           | 2(1)            |
| C(5)  | 23(1)           | 19(1)           | 26(1)           | 6(1)            | -1(1)           | 1(1)            |
| C(6)  | 27(1)           | 20(1)           | 23(1)           | 2(1)            | -2(1)           | 4(1)            |
| C(7)  | 29(1)           | 17(1)           | 27(1)           | 0(1)            | -3(1)           | -1(1)           |
| C(8)  | 40(2)           | 18(1)           | 29(1)           | 0(1)            | -1(1)           | -5(1)           |
| C(9)  | 61(2)           | 35(2)           | 42(2)           | -14(1)          | 3(1)            | -17(1)          |
| C(10) | 48(2)           | 28(1)           | 33(1)           | -4(1)           | 9(1)            | 3(1)            |
| C(11) | 30(1)           | 32(1)           | 38(1)           | 8(1)            | 3(1)            | -2(1)           |
| C(12) | 35(1)           | 32(1)           | 35(1)           | -1(1)           | 6(1)            | 4(1)            |

Table 5. Hydrogen coordinates ( $\times 10^4$ ) and isotropic displacement parameters ( $\text{\AA}^2 \times 10^{-3}$ ) for Compound **13**.

|        | x     | y    | z     | U(eq) |
|--------|-------|------|-------|-------|
| H(2A)  | 4230  | 1942 | 10093 | 39    |
| H(1A)  | 3079  | 3598 | 9528  | 25    |
| H(3A)  | 4072  | 6361 | 9087  | 31    |
| H(4A)  | 6299  | 6189 | 7989  | 31    |
| H(8A)  | 6105  | 4374 | 10827 | 34    |
| H(9A)  | 8154  | 6170 | 10484 | 69    |
| H(9B)  | 6812  | 6539 | 11220 | 69    |
| H(9C)  | 6274  | 7089 | 10368 | 69    |
| H(10A) | 2674  | 4561 | 10669 | 55    |
| H(10B) | 2908  | 6101 | 10479 | 55    |
| H(10C) | 3435  | 5552 | 11332 | 55    |
| H(11A) | 10290 | 5672 | 8598  | 50    |
| H(11B) | 9950  | 4884 | 7797  | 50    |
| H(11C) | 10707 | 4118 | 8559  | 50    |
| H(12A) | 7120  | 1670 | 7642  | 41    |
| H(12B) | 9003  | 2675 | 7577  | 41    |
